# Supplementary material for: Protecting those who protect nature by supporting conservationists’ mental wellbeing
Source: Research Square preprint supplement (doi:10.21203/rs.3.rs-1132018/v1), 2022-01-06
Supplement: Supplementary file 1 [file 6d4822432697f6950d5b2ecc.docx]

**Protecting those who protect nature by supporting conservationists' mental wellbeing**

**Supplementary information**

Thomas Pienkowski1,2,a; Aidan Keane2; Sofia Castelló y Tickell1; Emiel de Lange1,2; Mirjam Hazenbosch1; Munib Khanyari1,3,4; William N. S. Arlidge1,5,6; Gergő Baranyi7; Stephanie Brittain1; Vena Kapoor4; Vik Mohan8; Sarah Papworth9; Roshni Ravi4; Izak Smit10,11; E.J. Milner-Gulland1

1 Department of Zoology, University of Oxford, Zoology Research and Administration Building, 11a Mansfield Road, Oxford OX1 3SZ, United Kingdom

2 School of GeoSciences, University of Edinburgh, Crew Building, Alexander Crum Brown Road, Edinburgh EH9 3FF, United Kingdom

3 School of Biological Sciences, 24 Tyndall Ave, University of Bristol, BS8 1TQ, United Kingdom

4 Nature Conservation Foundation, 1311, Amritha, 12th Main, Vijayanagar 1st stage, Mysore 570017, India

5 Department of Biology and Ecology of Fishes, Leibniz-Institute of Freshwater Ecology and Inland Fisheries, Müggelseedamm 310, 12587 Berlin, Germany

6 Faculty of Life Sciences, Humboldt-Universität zu Berlin, Invalidenstrasse 42, 10115 Berlin, Germany

7 Centre for Research on Environment, Society and Health, School of GeoSciences, University of Edinburgh, Drummond Street, Edinburgh EH8 9XP, United Kingdom

8 Blue Ventures Conservation, The Old Library, Trinity Road, Bristol, BS2 0NW, United Kingdom

9 Department of Biological Sciences, Royal Holloway University of London, Egham Hill, Egham TW20 0EX, United Kingdom

10 Scientific Services Skukuza, South African National Parks, Private Bag x 402, Skukuza 1350, South Africa

11 Department of Zoology and Entomology, University of Pretoria, Pretoria, South Africa

a thomas.pienkowski@zoo.ox.ac.uk

# Supplementary information 1: Hypothesis table

Table S1. Personal characteristics and occupational risk factors expected to be associated with psychological distress in two models. The ‘ERI-score model’ includes the effort-reward imbalance score but excludes each item of the effort-reward imbalance instrument. The ‘ERI-item model’ includes each item of the instrument but excludes the effort-reward imbalance score. * Variables moderately correlated with other explanatory variables (*rho* >0.6) were removed from the statistical analysis post-hoc. †Ordinal exogenous variables were treated as numeric. ‡ Conservation-specific items added to the original effort-reward imbalance instrument. Key: RL = reference level; + = expected positive association; - = expected negative association; and ? = ambiguous or unclear expected association.

| **Variable type** | **Name** | **Statement** | **Description** | **Expected association with psychological distress** |
| --- | --- | --- | --- | --- |
| Personal characteristics | Dispositional optimism |  | A latent variable derived from the Life Orientation Test – Revised | (-) Those optimistic in life are expected to report lower psychological distress1. |
| Situational optimism |  | Latent situational optimism about conservation outcomes. | (-) Those more optimistic about outcomes for nature are expected to report lower psychological distress2. A correlation between situational and dispositional optimism was included in the analysis. |
| Gender |  | Female or male (RL = female) | (-) Gender-differentiated stressors are expected to affect men and women, with evidence that women can face barriers in conservation work3. Outside work, there can be greater social and cultural risk factors for psychological distress among women4,5. |
| Age* |  | Age in years | (?) Changes in biological and behavioural characteristics and how individuals are treated over their life course are expected to influence their risk of psychological distress, although exactly how is uncertain in this case4. |
| Years in conservation |  | Years working in conservation | (?) Those in conservation for longer are expected to be more established in their careers, with more secure roles and better compensation than early-career conservationists6. Alternatively, those in the sector for longer may have witnessed repeated failure to meet conservation goals, which may be distressing. |
| National / non-national |  | National or non-national (RL = national) | (?) Employees that are nationals of the country they work in may face differing pressures compared to non-nationals7,8, although relationships with reported psychological distress are unclear. |
| Education |  | University or non-university education (RL = non-University) | (?) Education level is both a consequence and determinant of socioeconomic status and social mobility, which are associated with poor mental health9,10. Equally, those with higher education may be more aware of the scale of nature loss, which may be distressing6. |
| Physical health† | “How is your physical health in general?” | A single item ordinal variable measuring general health. | (-) There is often co-morbidity between physical and mental health, which may be bi-directional, so we expect good health to be negatively associated with psychological distress11. |
| Personal relationships† | Satisfied with:  “…your personal relationships?” | Each of the three social support items | (-) Social support appears consistently associated with better mental and physical health, although the relationship may be bi-directional12. |
| Friends and family support† | “…the support you get from your friends and family?” |
| Friends and family time† | “…the amount of time you are able to spend with friends and family”† |
| Workplace conditions | Effort-reward score |  | The adapted effort-reward imbalance score (‘ERI-score model’). | (+) A high ratio of effort relative to reward is expected to be associated with psychological distress (e.g.,13-18). |
| Heavy workload† | “I have constant time pressure due to a heavy work load” | The effort items from the adapted effort-rewards imbalance instrument (‘ERI-item model’). | (+) Each effort item from the adapted effort-rewards imbalance instrument is expected to be positively associated with psychological distress. |
| Many disturbances*,† | “I have many interruptions and disturbances while performing my job” |
| Increasingly demanding job† | “Over the past few years, my job has become more and more demanding” |
| Not enough resources† | “I do not have the resources I need to archive my work goals” |
| Not enough funding*, † | “The organisation I work for does not have enough funding to achieve its main aims” ‡ |
| Organisational instability† | “The organisation I work for may not exist in five years time” ‡ |
| Respect I deserve*,† | “I receive the respect I deserve from my boss and work colleagues” | The reward items from the adapted effort-rewards imbalance instrument (‘ERI-item model’). | (-) Each reward item from the adapted effort rewards imbalance instrument is expected to be negatively associated with psychological distress. |
| Job advancement prospects*,† | “My job promotion or advancement prospects are poor (reverse coding)” |
| Do not expect undesirable job change† | “I have experienced or I expect to experience an undesirable change in my work situation (reverse coding)” |
| Good job security† | “My job security is poor (reverse coding)” |
| Respect and prestige† | “Considering all my efforts and achievements, I receive the respect and prestige I deserve at work” |
| Job advancement† | “Considering all my efforts and achievements, my job promotion or advancement prospects are adequate” |
| Income is alright† | “Considering all my efforts and achievements, my salary or income is alright” |
| Contribution to conservation† | “I am satisfied with the contribution I make to conservation” ‡ |
| Social pride† | “My friends and family are proud that I work in conservation” ‡ |
| Position |  | Academia and research or practice and policy (RL = academia and research) | (?) Academics and practitioners or policymakers face different challenges and rewards, although the relationship with reported psychological distress is unclear. |
| Dangerous at night*,† | “It is dangerous to go outside at night alone” | Each of the three items describing personal security at work and home | (+) Threats to personal security at work and home are expected to be positively associated with psychological distress19,20. |
| Dangerous situations† | “My work puts me in dangerous situations” |
| Not feeling safe† | “I do not feel safe, even where I live” |
| Working hours |  | Work hours per week | (+) Some evidence suggests that high working hours is expected to contribute to burnout and psychological distress21. |

# SI 2: Model fit

The ‘ERI-score’ model had a mean root mean square error of approximation of 0.05 (95% confidence interval 0.05 - 0.05), Tucker–Lewis index of 0.98, and standardized root mean square residual of 0.06 across the ten imputed datasets. The ‘ERI-item model’ had a mean root mean square error of approximation of 0.04 (95% confidence interval 0.04 - 0.04), Tucker–Lewis index of 0.98, and standardized root mean square residual of 0.05 across the imputed datasets. These measures suggested that both models fitted the data well.

# SI 3: Removing dispositional optimism

Dispositional optimism may be a confounding variable between psychological distress and other explanatory variables. To evaluate this, we repeated the analysis after the dispositional optimism variable and compared the results to those of the original model. However, the results were consistent with the primary analysis, suggesting dispositional optimism did not have a confounding effect (Figure S1).


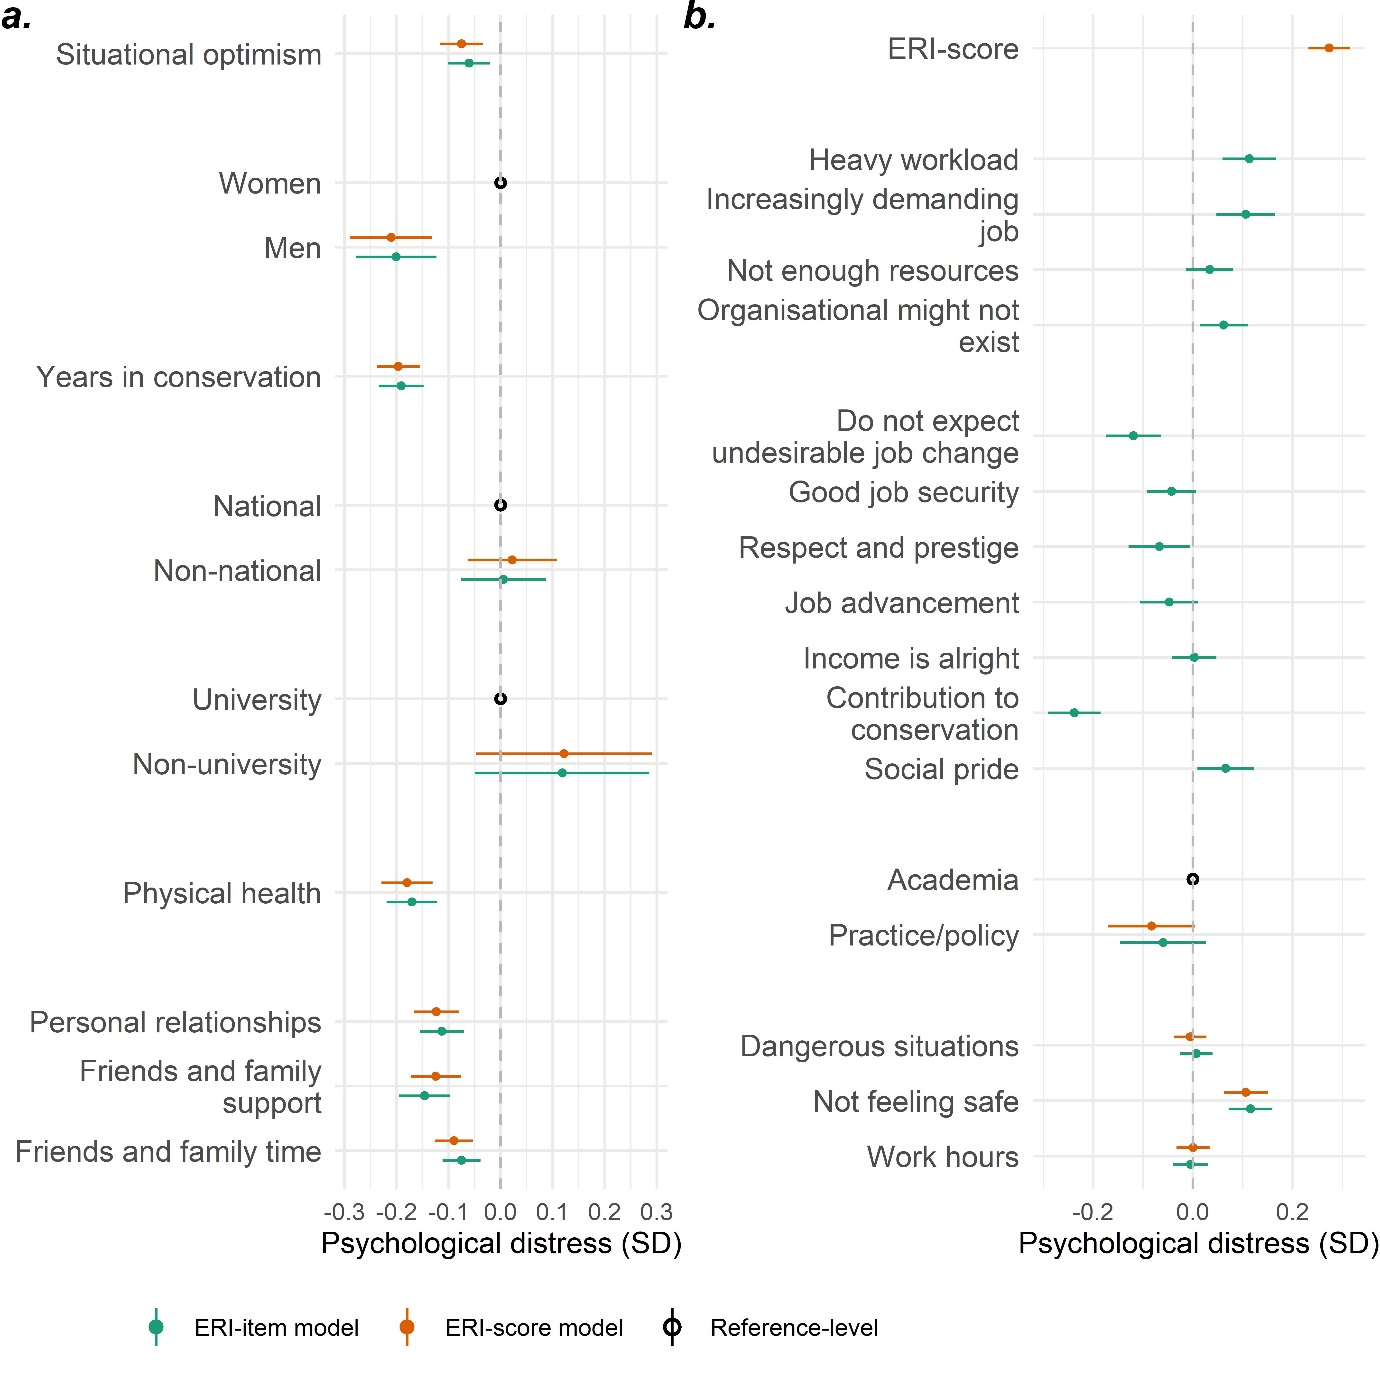


Figure S1. The estimated association in standard deviations (SD) between latent psychological distress and personal characteristics and occupational risk factors among 2306 respondents. Dispositional optimism was removed from the analysis. ‘ERI-score model’ included the effort-reward imbalance score but excluded the individual instrument items, while the ‘ERI-item model’ included these items but excluded the score. Continuous variables were scaled and centred. ‘Unknown’ response levels are not shown.

# SI 4: Replace situational optimism with collective goal progress satisfaction

Goal progress increases feelings of control, autonomy, and competence and alleviates distress caused by unmet needs and undesirable situations22. Consequently, satisfaction with goals progress may contribute to wellbeing, but inadequate progress may be a source of distress23-25. For instance, a meta-analysis of 85 studies found consistent positive associations between subjective wellbeing and perceived goal progress26. We, therefore, replaced situational optimism with a measure of satisfaction with collective conservation goal progress. This measure was developed in Pienkowski, et al. 6.

In summary, six statements were developed, based on sub-dimensions of the value-belief-norm theory and other literature27,28 (Table S2). These were developed during a series of workshops attended by six authors. Not all conservationists were expected to endorse the same goals. So, respondents were first asked which goals were important. Second, for those considered important, respondents were to indicate their satisfaction or dissatisfaction according to five response levels ranging from *“very dissatisfied”* (1) to *“very satisfied”* (5). Respondents were asked to think about the conservation area or context they were most familiar with when responding to questions about collective goals. The satisfaction scores for each endorsed goal were added together, then scaled and centred for each respondent. This variable was used as an indicator of satisfaction with collective conservation goal progress.

Table S2. Six statements describing collective conservation goal progress satisfaction developed based on sub-dimensions of the value-belief-norm theory27,28.

| **Dimension** | **Sub-dimension** | **Corresponding goals** |
| --- | --- | --- |
| Altruistic | Equality: equal opportunity for all | “Making sure people are treated equally and fairly” |
| Social justice: correcting injustice, caring for the weak |
| A world at peace: free of war and conflict | “Avoiding conflict between people and conservation” |
| Helpful: working for the welfare of others | “Ensuring people benefit from nature in a sustainable way” |
| Biospheric | Preventing pollution: protecting natural resource | “Stopping human-driven species loss” |
| Respecting the earth: harmony with other species | “Creating a more sustainable world” |
| Unity with nature: fitting into nature |
| Protecting the environment: preserving nature | “Stopping damage to the natural world” |

In this supplementary analysis, collective goal progress satisfaction had a small negative association with psychological distress (Figure S2). This small association corroborates our suggestion that respondents may be less concerned about the “bigger picture” of ongoing biodiversity loss in contrast to their own role (indicated by their reported satisfaction with their contributions to conservation”).


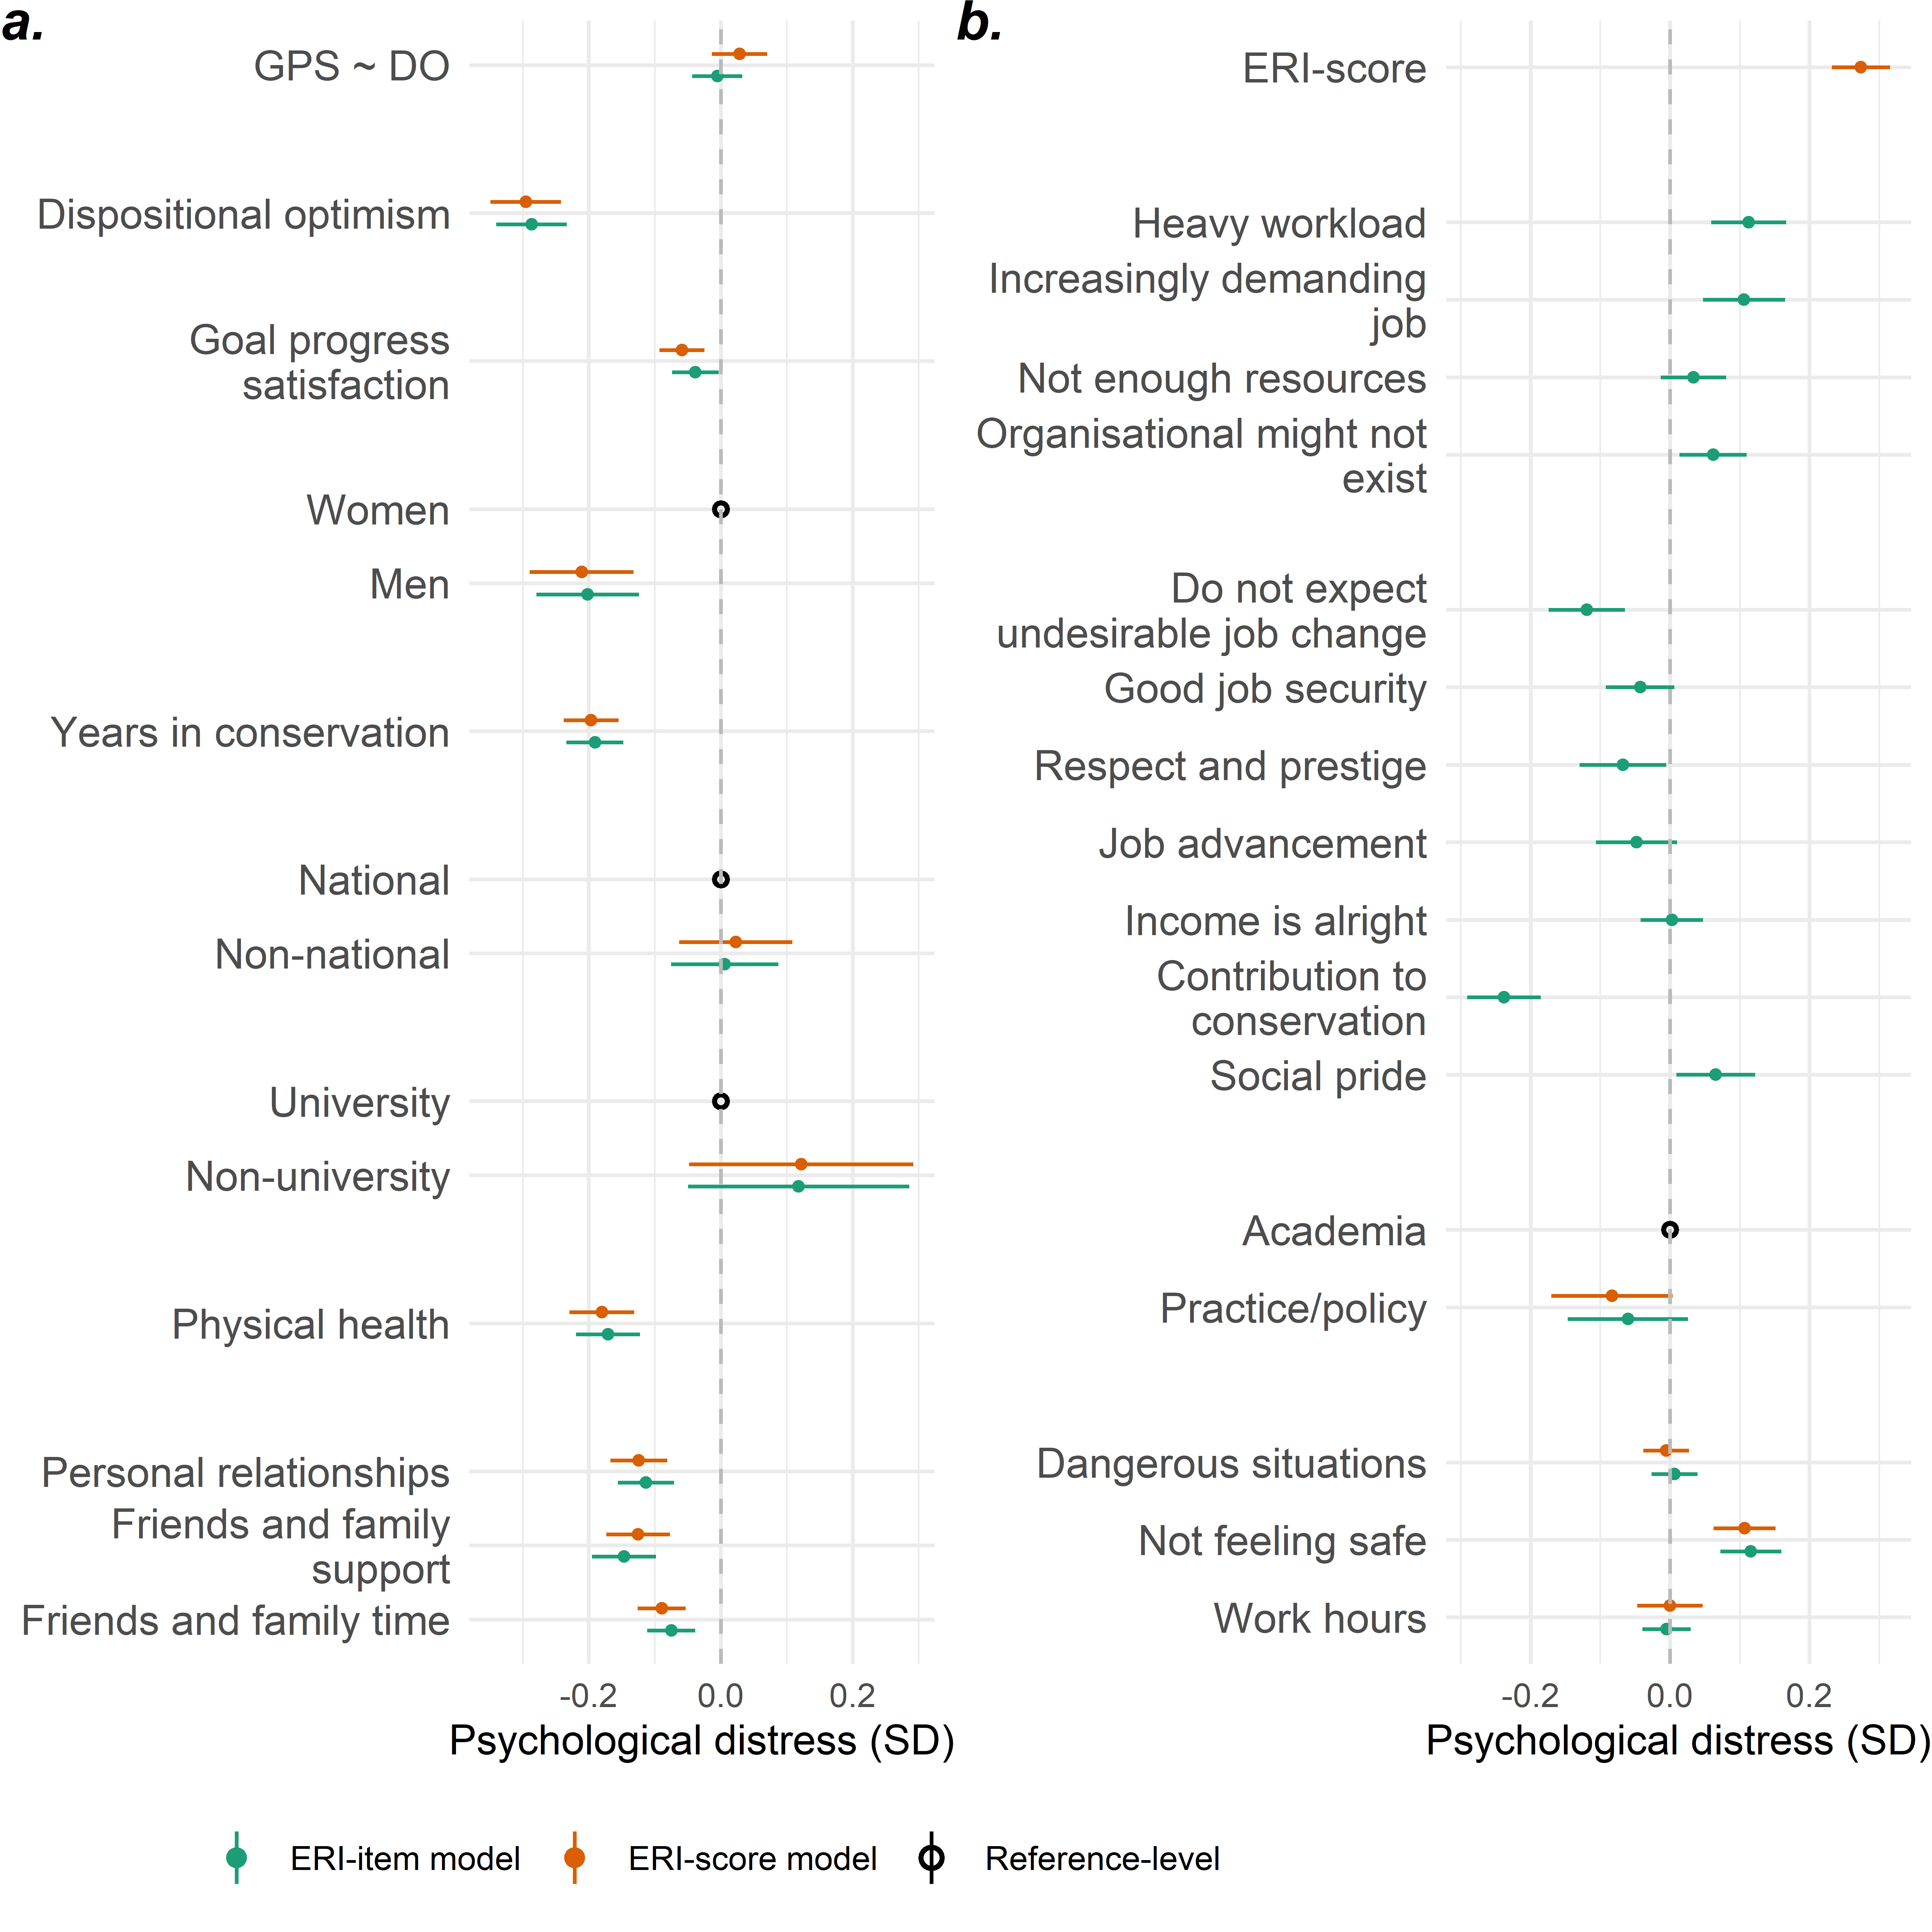


Figure S2. The estimated association in standard deviations (SD) between latent psychological distress and personal characteristics and occupational risk factors among 2306 respondents. Situational optimism was replaced with a measure of respondents’ satisfaction with collective conservation goal progress. ‘ERI-score model’ included the effort-reward imbalance score but excluded the individual instrument items, while the ‘ERI-item model’ included these items but excluded the score. Continuous variables were scaled and centred. ‘Unknown’ response levels are not shown.

# SI 5: Exploring the role of age

Age was excluded from the primary analysis because of its strong association with years’ experience in conservation (Figure S3). To explore the sensitivity of our primary result, we substituted the years in conservation variable with age. The results of this analysis were consistent with the primary analysis (Figure S4). Furthermore, the primary analysis interprets years in conservation as a proxy for many social, professional, and biological changes that occur throughout the life course. However, we conducted a supplementary analysis that included both years in conservation and age. Both had similar associations with psychological distress, which were approximately half as large as the association observed for years in conservation in the original analysis (Figure S5).


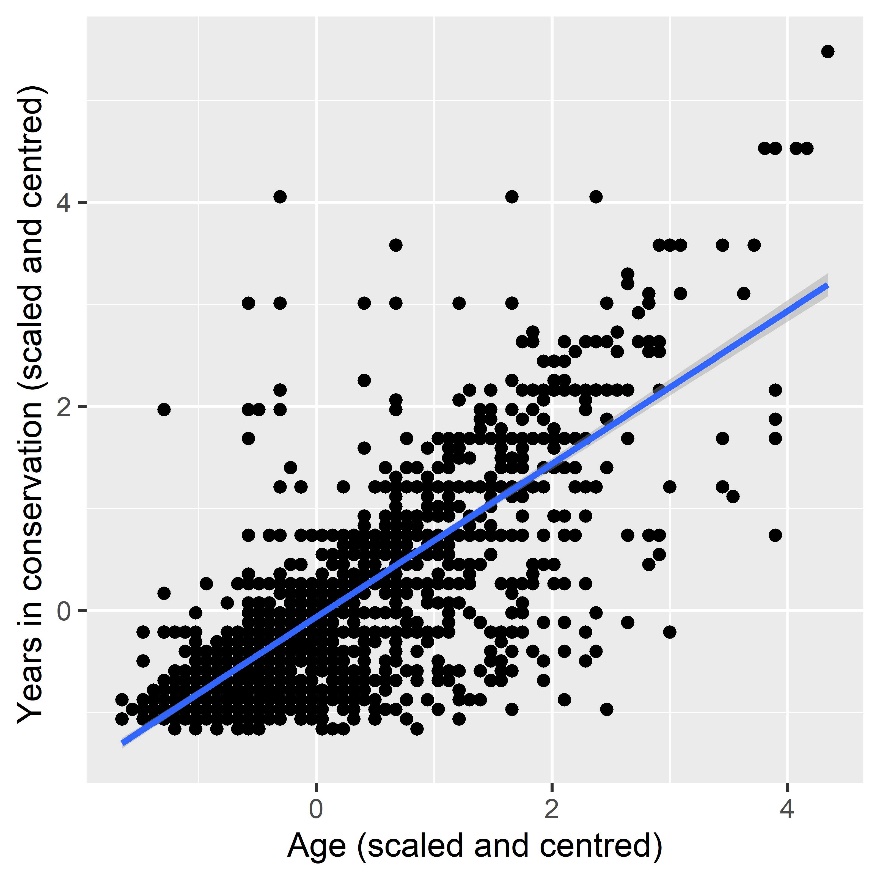


Figure S4. The association between age and years in conservation (both scaled and centred).


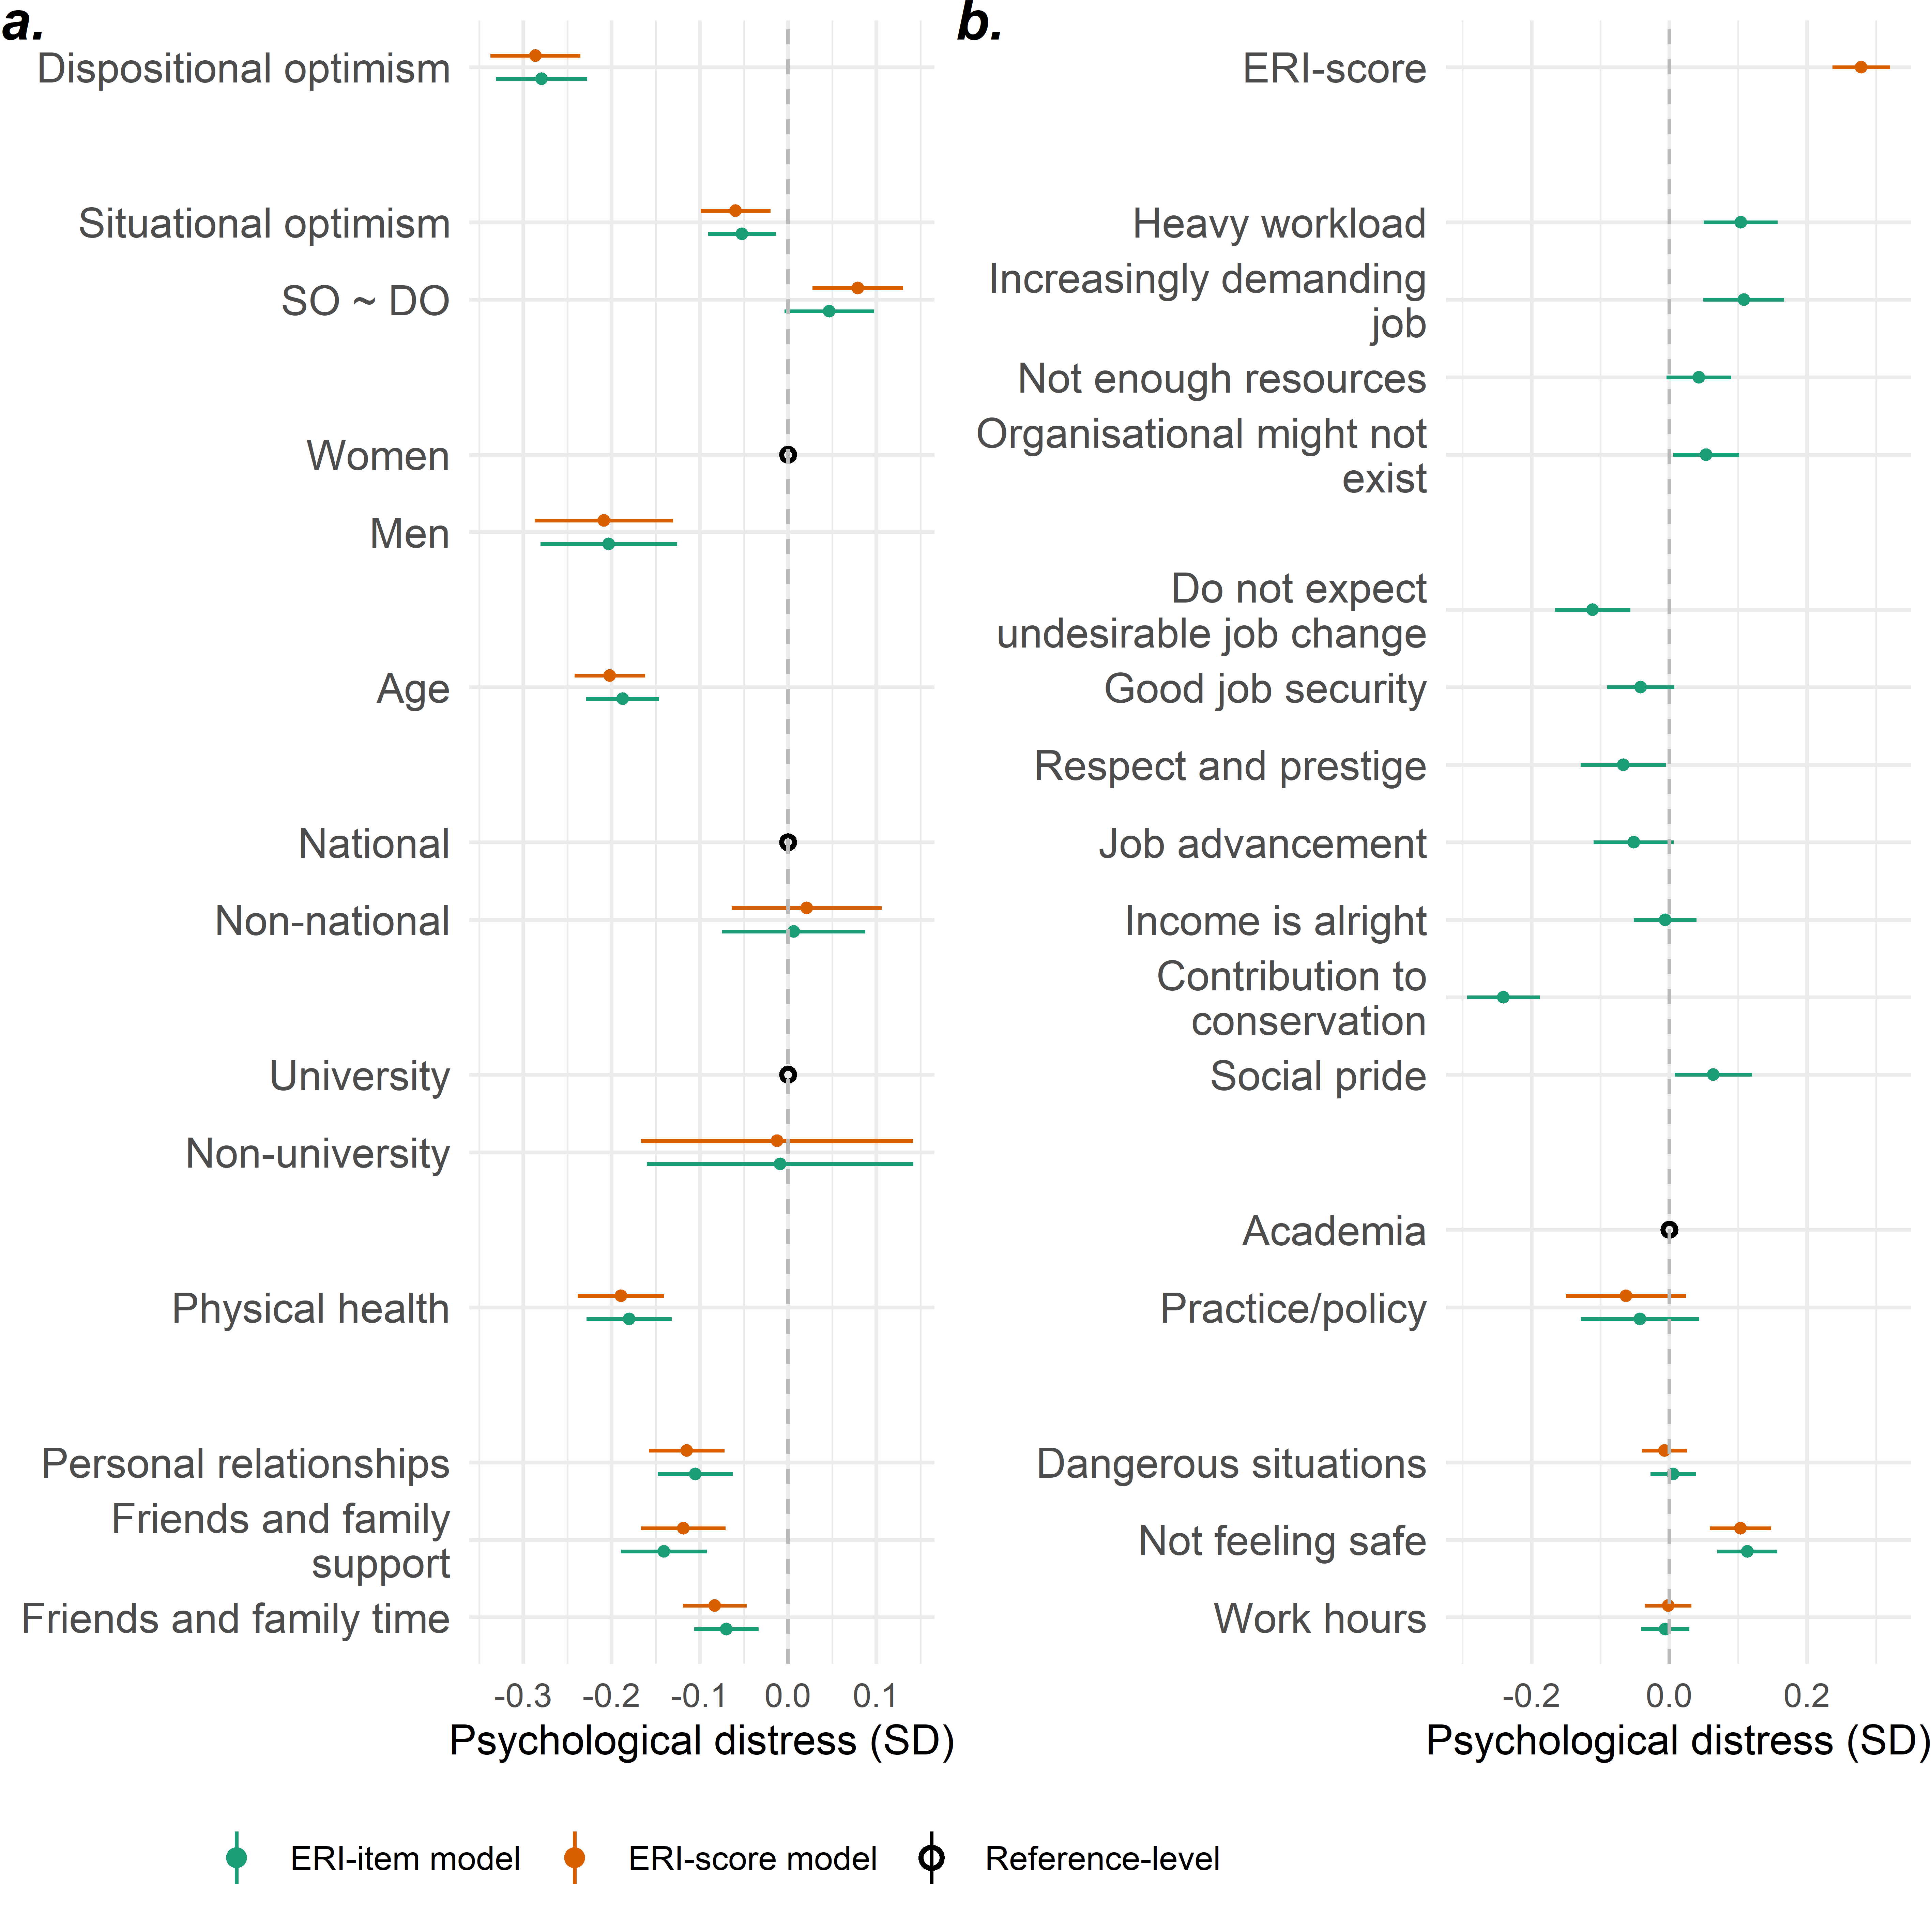


Figure S4. The estimated association in standard deviations (SD) between latent psychological distress and personal characteristics and occupational risk factors among 2306 respondents. Years in conservation was replaced with age. ‘ERI-score model’ included the effort-reward imbalance score but excluded the individual instrument items, while the ‘ERI-item model’ included these items but excluded the score. Continuous variables were scaled and centred. ‘Unknown’ response levels are not shown.


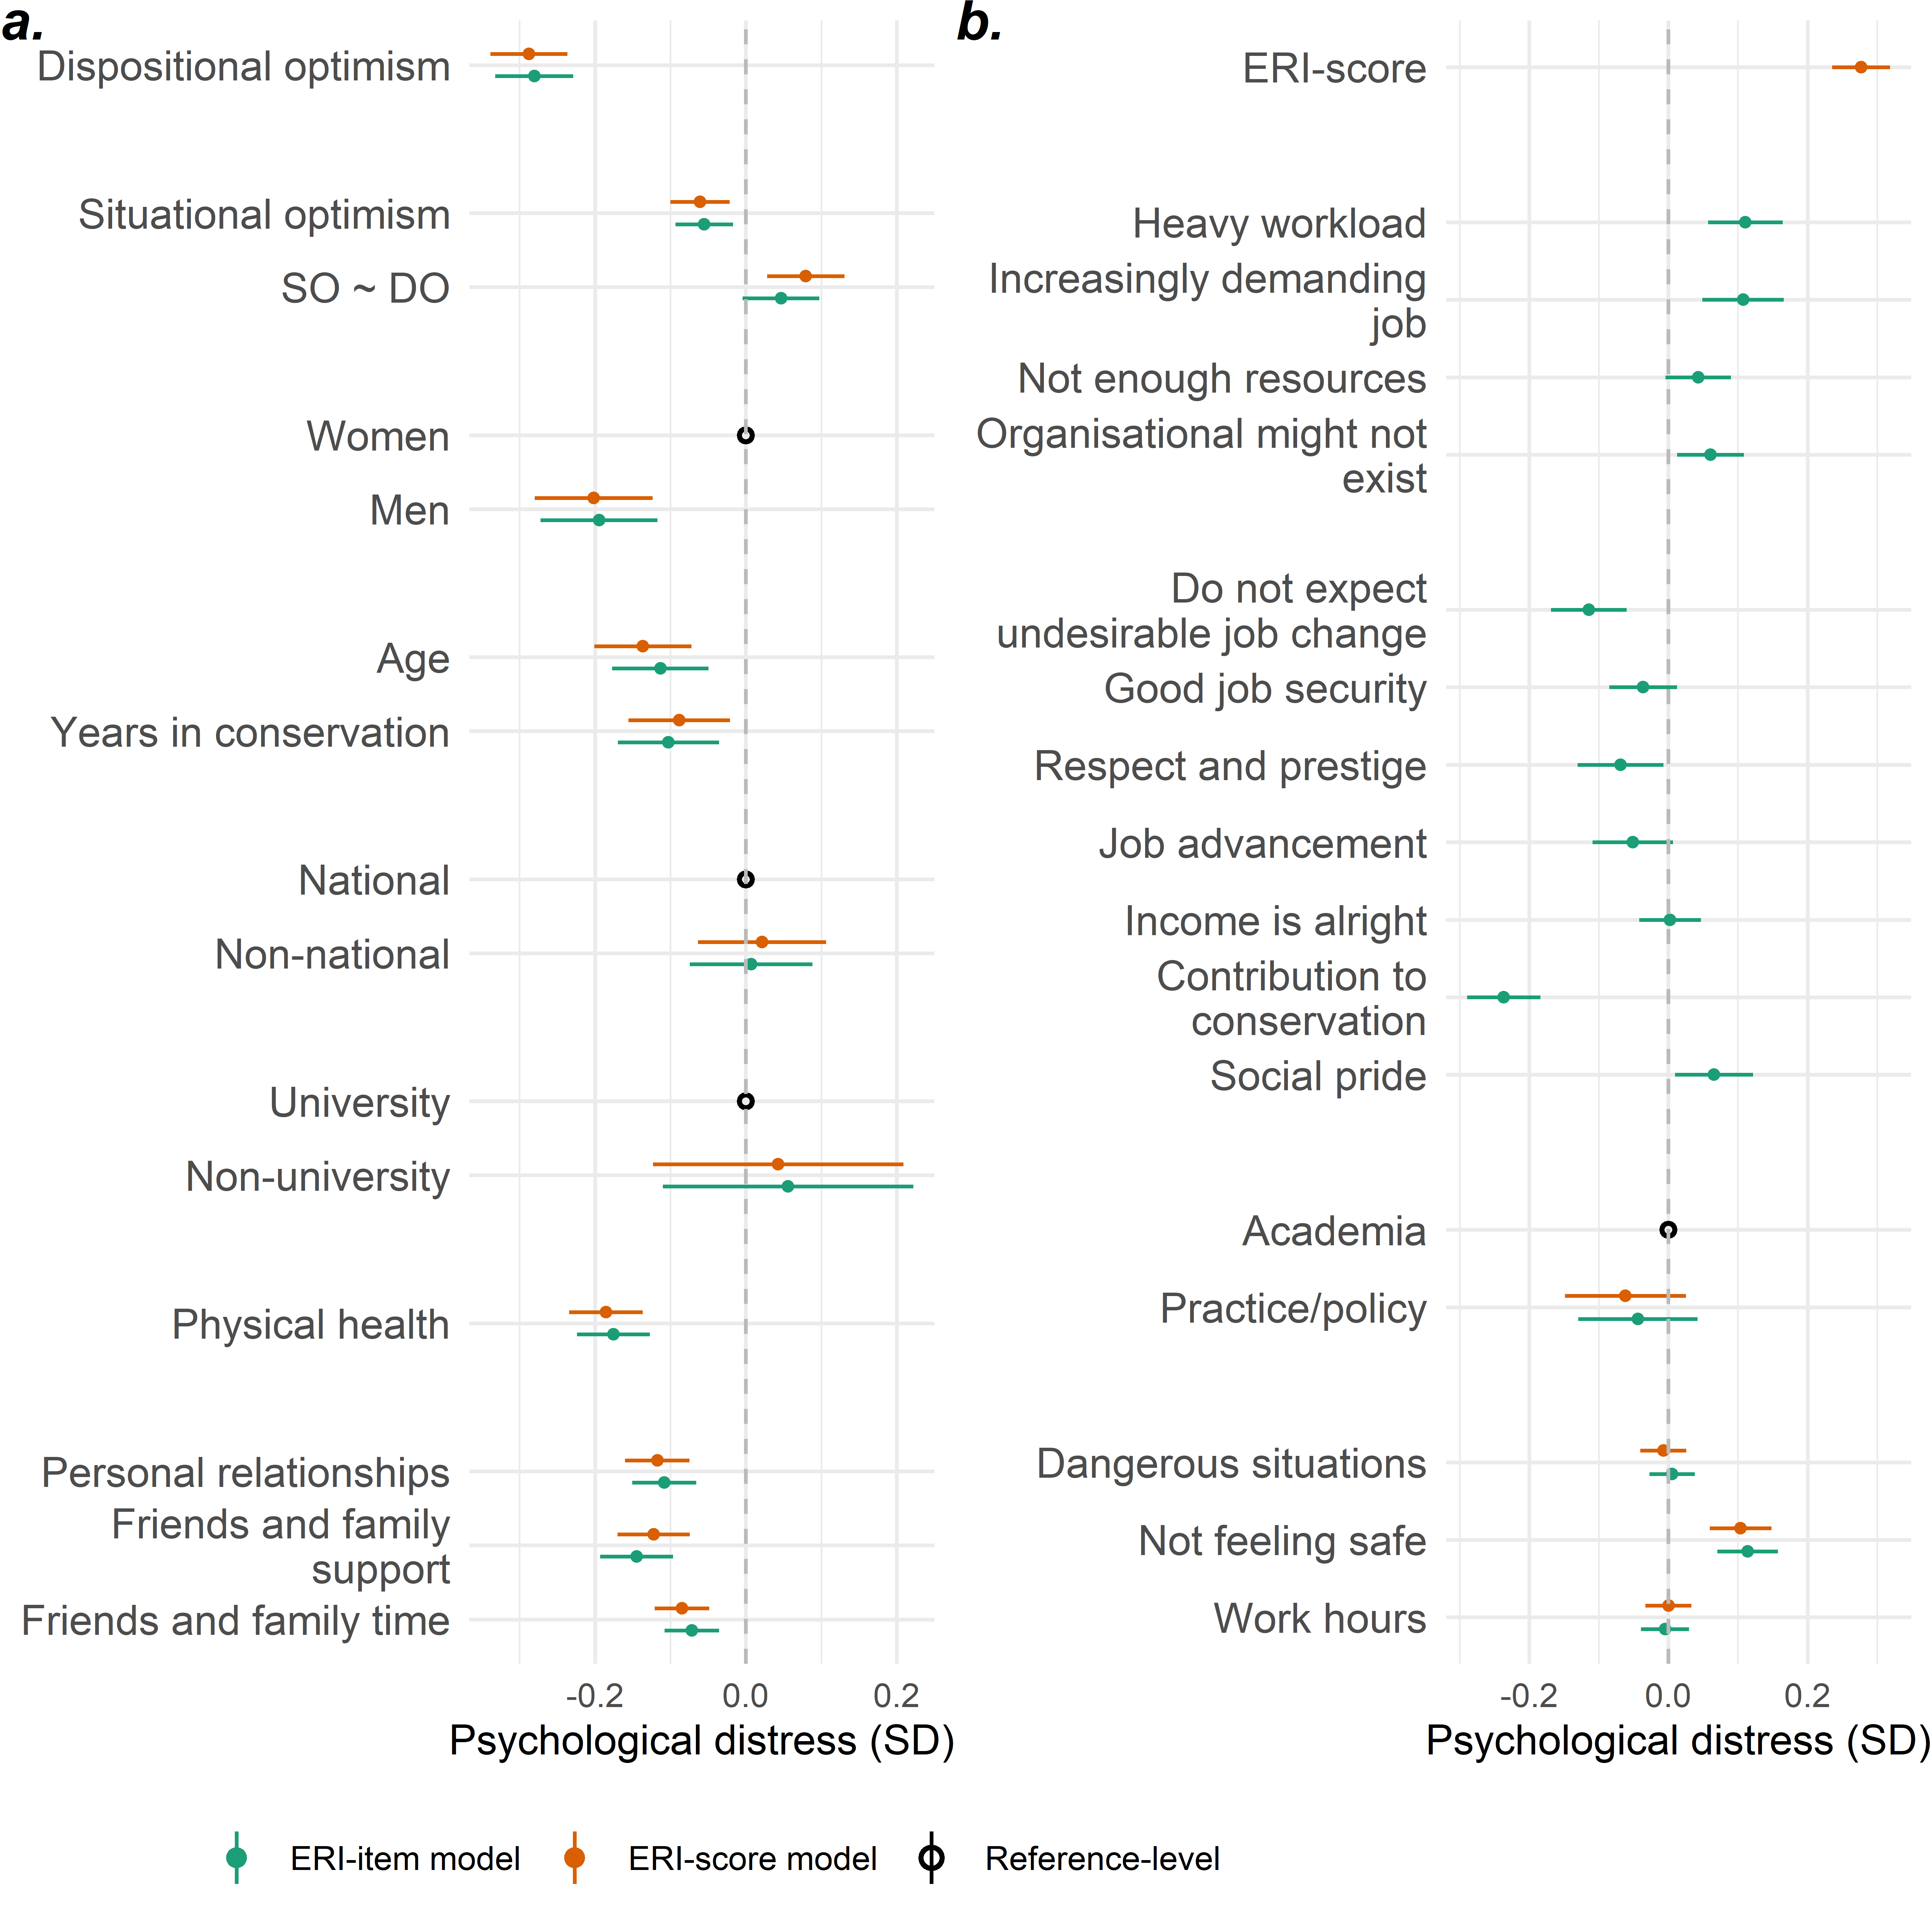


Figure S5. The estimated association in standard deviations (SD) between latent psychological distress and personal characteristics and occupational risk factors among 2306 respondents. Both age and years in conservation were included in this analysis. ‘ERI-score model’ included the effort-reward imbalance score but excluded the individual instrument items, while the ‘ERI-item model’ included these items but excluded the score. Continuous variables were scaled and centred. ‘Unknown’ response levels are not shown.

# SI 6: Gender-disaggregated analysis

To explore how risk factors for psychological distress varied between men and women, the analysis was repeated disaggregated by gender. The results were broadly consistent between the two analyses (Figure S6 and S7). However, one notable difference was that women in academia reported higher rates of distress than those in practice. In contrast, there was no significant difference in distress between male academics and practitioners.


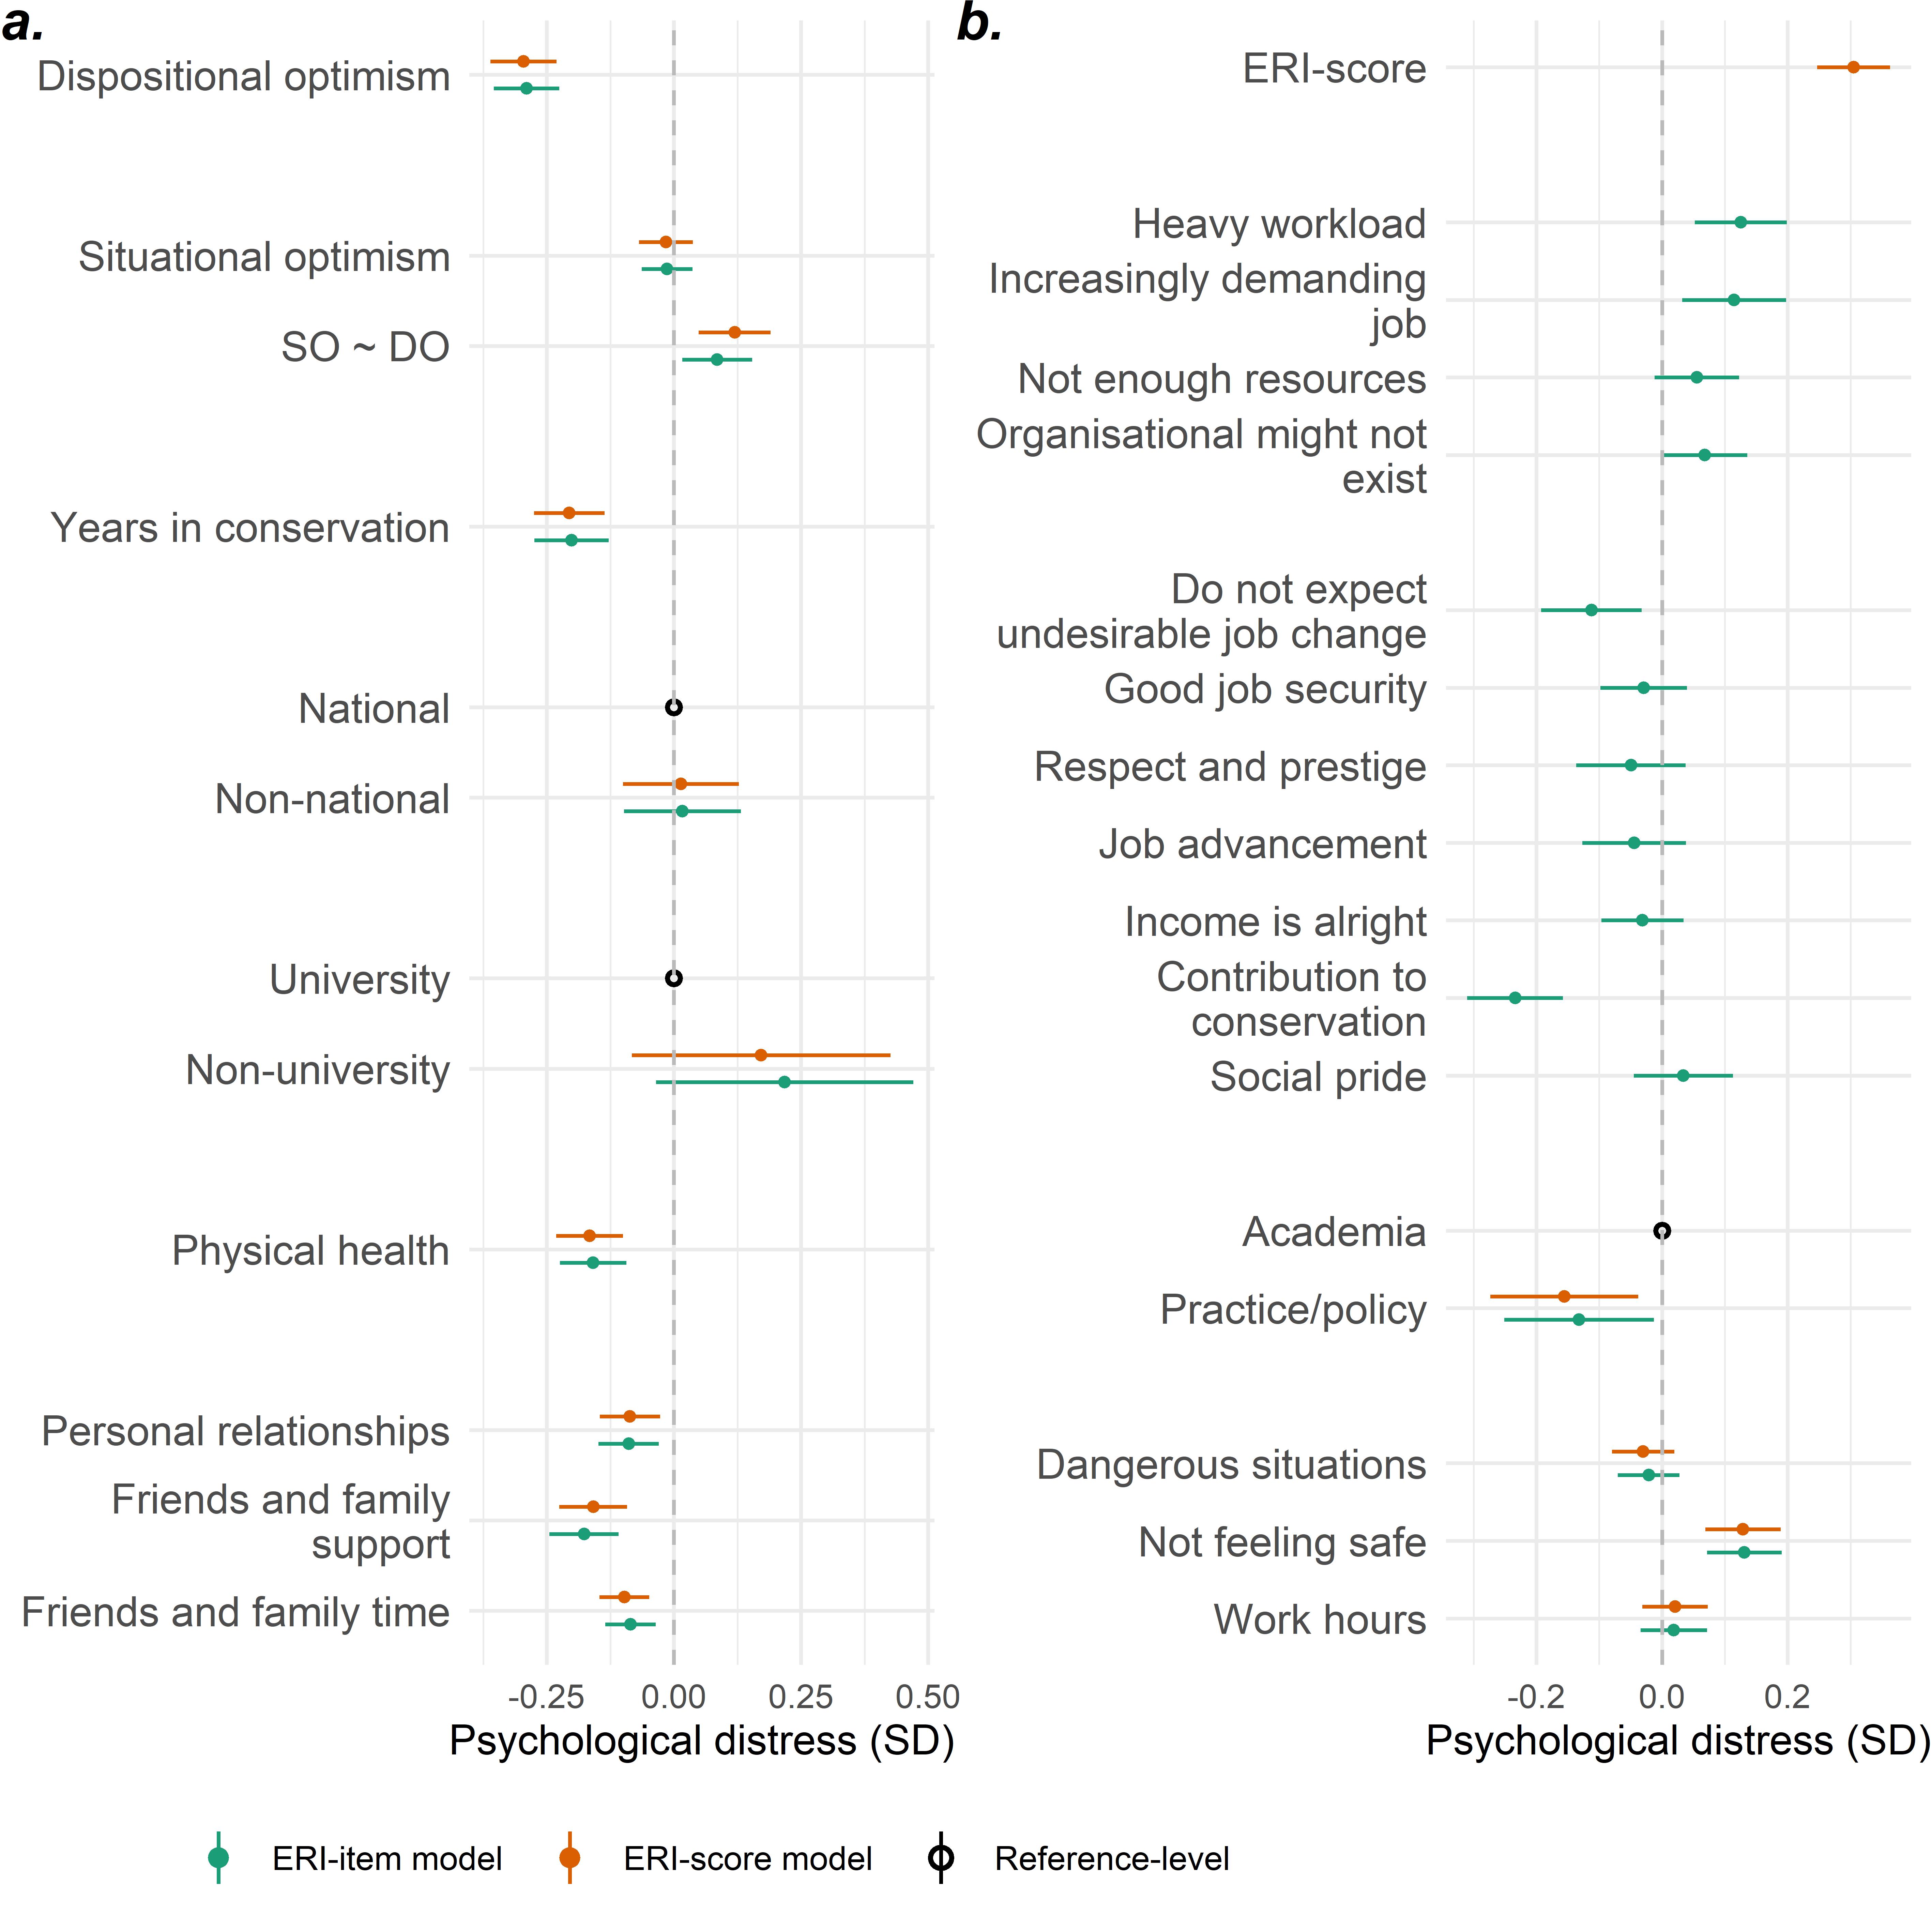


Figure S6. The estimated association in standard deviations (SD) between latent psychological distress and personal characteristics and occupational risk factors among 1208 women respondents. ‘ERI-score model’ included the effort-reward imbalance score but excluded the individual instrument items, while the ‘ERI-item model’ included these items but excluded the score. Continuous variables were scaled and centred. ‘Unknown’ response levels are not shown.


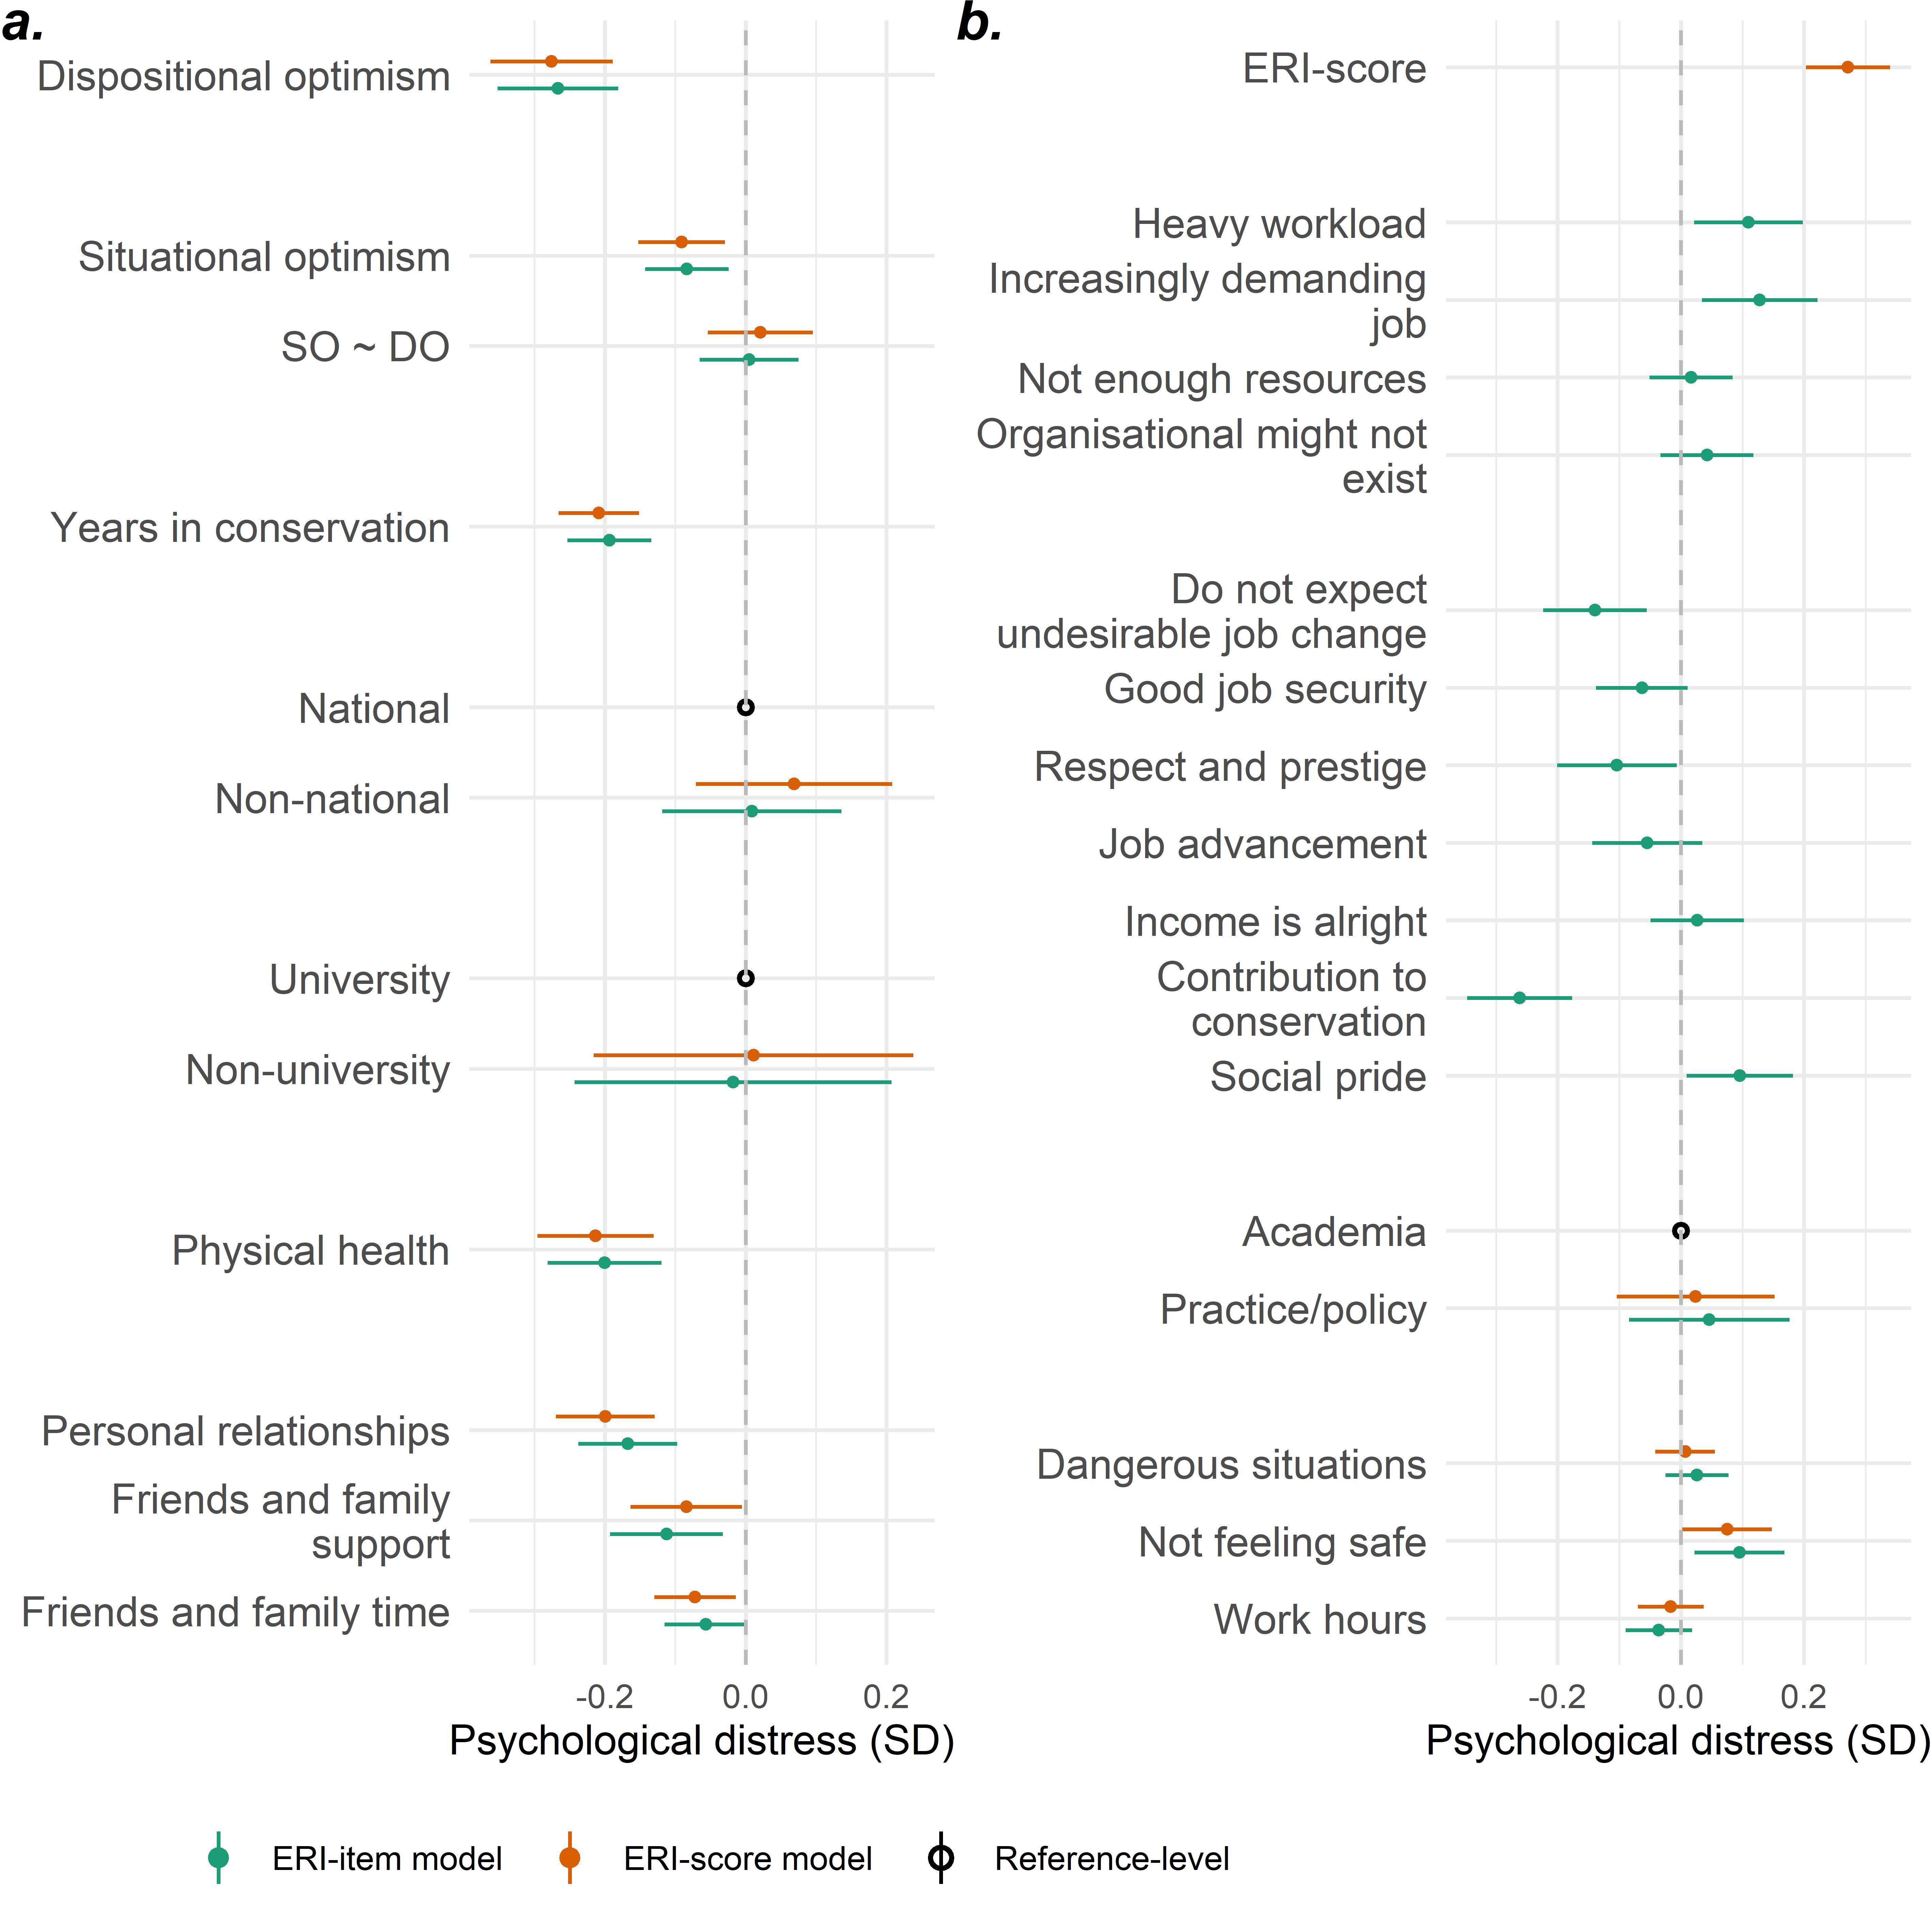


Figure S7. The estimated association in standard deviations (SD) between latent psychological distress and personal characteristics and occupational risk factors among 969 men respondents. ‘ERI-score model’ included the effort-reward imbalance score but excluded the individual instrument items, while the ‘ERI-item model’ included these items but excluded the score. Continuous variables were scaled and centred. ‘Unknown’ response levels are not shown.

# SI 7: Suggestions table

The following suggestions are based on the UK Government’s *Thriving at Work* mental health core standards29, which we tailored through interviews and written feedback from a purposeful sample of 20 team leaders and human-resource personnel in 14 conservation organisations. These individuals work internationally (7) or in Central and Southern Asia (5), Sub-Saharan Africa (4), and Eastern and South-Eastern Asia (4). The options presented in Table S3 focus on office-based workers but could be considered alongside advice for supporting other groups, such as rangers or field-based staff (e.g.,30). Furthermore, some conservation organisations already take proactive measures to support staff mental health and wellbeing, particularly those that are larger and better resourced. Consequently, our suggestions are aimed at those taking the first steps to actively managing staff wellbeing, which may include many smaller or less well-resourced organisations.

Table S3. Suggestions for employers for supporting staff mental health and wellbeing.

| **Suggestions** | **Description** | **Considerations and risks** |
| --- | --- | --- |
| Understand experiences, attitudes, and knowledge among staff. | This option involves exploring the challenges, rewards, experiences, and attitudes around wellbeing and mental health within an organisation. Doing so may help tailor actions to specific needs in an organisation and between groups. Exploring attitudes around mental health and wellbeing might reveal the need for awareness-raising, including around stigma. Furthermore, this step may also involve identifying gaps in knowledge and expertise around mental health, which may be addressed through training and recruitment. | - Staff may be hesitant to disclose challenges because of concerns about reprisal. Similarly, some might not be open about their attitudes towards mental health. Furthermore, it may be challenging to create an environment where individuals speak openly. |
| Produce, implement, and update a wellbeing at work plan. | The plan should outline the steps taken to manage employee wellbeing at work. These steps should be based on an understanding of the experiences of staff in different roles in an organisation. The steps could include awareness-raising, training managers, enhancing positive job aspects, addressing workplace stressors. The plan could be developed after consulting the many free-to-use online resources in this area (e.g., [Business in the Community: Mental health toolkit](https://www.bitc.org.uk/wp-content/uploads/2021/01/bitc-wellbeing-toolkit-mentalhealthforemployers-Jan2020.pdf)  [for employers](https://www.bitc.org.uk/wp-content/uploads/2021/01/bitc-wellbeing-toolkit-mentalhealthforemployers-Jan2020.pdf)). It is important that the plan is not just produced but implemented and periodically updated, which may partly depend on the levels of engagement across an organisations hierarchy. Employers might consider co-designing the plan with staff – including allowing different groups and teams to develop measures appropriate for them. Furthermore, discussing the costs (such as sickness absence and staff turnover) and benefits (like engagement and productivity) linked to working conditions might generate senior management buy-in. Senior managers can play a critical role in organisational culture, so they should promote the plan and set an example through their behaviour. In some cases, some awareness-raising might be needed before the plan is developed. | - Staff may raise issues during the consultation that are challenging or take time to address. Failing to manage expectations about what the plan can achieve, especially in the short run, could be demotivating and create resentment. - Similarly, designing but failing to implement the plan over the long term may waste resources and be demotivating. This point emphasises the importance of senior management buy-in and recognition that implementation is an ongoing process. - Plans that are “handed down” from a head office or human resource personnel – rather than designed with staff input – may have limited uptake. Nevertheless, leaders and human resource personnel may play a key role in driving the process. - Designing a comprehensive plan is likely to take time, effort, and resources. Small organisations without dedicated human resource personnel may struggle to find the right people to lead this process. In this case, an ad-hoc committee might be tasked with leading the plan. Alternatively, they might identify a ‘champion’ to lead this process. However, these responsibilities should be reflected in work plans (rather than being extra commitments) and be supported by senior management. These individuals may also require additional training (see *Promote effective team leadership*). |
| Develop awareness of wellbeing and resources among all staff. | Awareness among supervisors, team leaders, and other employees may help individuals care for themselves and others. Raising awareness of signs of poor mental health and burnout may help individuals and teams take proactive steps to manage these issues. Organisations could dedicate time to discussing mental health and wellbeing, such as during all-staff and team meetings. Employers could also share some of the many free to use online resources discussing workplace wellbeing and mental health:   - [Mind: Taking care of yourself](https://www.mind.org.uk/workplace/mental-health-at-work/taking-care-of-yourself/) - [Mind: Taking care of your staff](https://www.mind.org.uk/workplace/mental-health-at-work/taking-care-of-your-staff/)   Employers could make these resources available on staff intranets or subscribe to an Employee Assistance Program (which can include resources and counselling services). | - Many factors beyond work and related to individual circumstances can influence someone risk of poor mental health. So, the responsibility to manage mental health is balanced between employers and individuals. Discussions could include raising awareness of this balance of responsibilities and the need for staff engagement. |
| Encourage open conversations about wellbeing and mental health and the support available. | Staff should be encouraged to talk openly about wellbeing and mental health, where appropriate. These conversations can occur across settings, such as during meetings, when recruiting staff, or in conversation with line managers. A Wellness Action Plan may facilitate conversations between employees and line managers (e.g., [Mind: Guide for line managers](https://www.mind.org.uk/workplace/mental-health-at-work/taking-care-of-your-staff/employer-resources/wellness-action-plan-download/)). Furthermore, ideas and beliefs about mental health can vary between places and groups. In some contexts, talking about wellbeing might be an entry point for discussing mental health and stigma. | - Developing and implementing a Wellness Action Plan can be a time consuming and in-depth process. So, these might be prioritised for staff who are struggling. - Poorly informed or stigmatising opinions expressed during conversations might be counter-productive. In some contexts, prior awareness-raising and a set of ground rules might be needed. Those leading efforts at an organisation might facilitate these conversations. |
| Provide good working conditions – ‘promoting the positives’. | Good working conditions can include ‘promoting the positives’. This promotion may include recognising and celebrating successes (particularly at a team level) and fostering social support between colleagues (such as through group tea breaks and activities). In addition, employers might examine employees’ motivations and positive work experiences in order to enhance them. For instance, many are motivated to work in conservation because they enjoy spending time in nature28. Furthermore, exercise in nature can support good mental health31. So, staff might be provided with opportunities to do outdoor activities, like hiking.  Organisations might consider making public commitments to supporting mental health, such as signing the [Mindful Employer Charter](https://www.mindfulemployer.dpt.nhs.uk/) (giving access to resources and training). They may also consider providing private medical insurance or subscribing to an Employee Assistance Program. | - Providing benefits is not a substitute for meeting legal requirements around working conditions. Promoting the positives should go hand-in-hand with removing risks. - Some actions might be relatively cheap, such as set times for group coffee breaks or highlighting successes. Others might be more time consuming and costly, such as providing private medical insurance or subscribing to an Employee Assistance Program. As such, some means of ‘promoting the positive’ might not be feasible for small or poorly resourced organisations. - Focusing only on celebrating successes may create a culture that deters sharing failures, uncertainties, and criticisms. Doing so may limit opportunities to learn from failure and address problems32. Consequently, celebrating successes could occur within an action learning cycle that also recognises and learns from issues. |
| Provide good working conditions – removing the risks. | Good working conditions can also include removing workplace risks to wellbeing. Our results suggest that excessive workload, high job demand, job instability, organisational instability, and an overall imbalance of efforts and rewards can be distressing. Employers might also consider other risk factors around emotional demand, job control, health and safety, pay, issues of discrimination and bullying, and career progression33,34. In addition, employers should meet minimum legal requirements, which vary between countries and roles). In the UK, these include:   - Fulfilling duty of care responsibilities (including health and safety in the workplace). - Paying minimum wage (but aspiring to pay a living wage). - Providing statutory holiday, sick, maternity and other pay (where eligible). - Not mandating employees work more than 48 hours a week (unless they opt to do so). - Protecting against discrimination. - Protecting those who report wrongdoing in the workplace.   While the emphasis should be on removing workplace risk factors, some staff might also benefit from resources to help build resilience (e.g., [Mind: How to manage stress](https://www.mind.org.uk/information-support/types-of-mental-health-problems/stress/developing-resilience/)). | - Some risk factors, such as those linked to work-life balance, might be reasonably feasible to address. For example, organisations might adopt rules around emailing outside office hours or move towards flexible working patterns. However, other challenges, such as job and organisational insecurity, might be outside an employer’s immediate control. These intractable challenges suggest the need to manage staff expectations – perhaps during the planning phase – for what challenges are likely to remain. It also highlights the need for other actors, such as funders, to create structural changes to support wellbeing in the sector. |
| Promote effective team leadership. | Good team leadership may support employee wellbeing at multiple levels. Good leadership can help ‘promote the positives’ (such as fostering collegial support) and removing risks (like managing team workloads). Team leaders can also be trained to identify signs of burnout and poor mental health and make adjustments or provide resources to those who are struggling. Employers might improve team leadership by recruiting those with appropriate management skills. Alternatively, employers might arrange formal training (e.g., [Mindful Employer Charter](https://www.mindfulemployer.dpt.nhs.uk/)) or encourage, create time, and expect leaders to review online resources (e.g., [CIPD: Factsheets A – Z](https://www.cipd.co.uk/knowledge/practical-guidance-a-z/factsheets), [Mind: Taking care of your staff](https://www.mind.org.uk/workplace/mental-health-at-work/taking-care-of-your-staff/), [Mind: Guide for line managers](https://www.mind.org.uk/workplace/mental-health-at-work/taking-care-of-your-staff/employer-resources/wellness-action-plan-download/)). | - Reviewing online resources and training may have limited effectiveness unless leaders are rewarded for supporting team wellbeing. This reward could include recognizing good practices during performance reviews. - Training may not be feasible for small, inadequately resourced organisations or where teams are isolated. In these cases, team leaders might be supported and expected to review free to use online resources. |
| Routinely monitor employee mental health and wellbeing. | Many employers monitor sickness absence, which can help identify those who may be struggling. This monitoring could be combined with informal monitoring by team leaders trained to spot signs of burnout and poor mental health. This monitoring may help identify individuals needing support. Moreover, it might reveal workplace stressors that should be addressed. | - These data are sensitive, so they should be handled by dedicated human resource personnel. Organisations without such personnel should consider the risks of collecting these data, who would access them, and why. In particular, there may be risks that data are used to discriminate against staff. In some cases, organisations may decide against adopting this option. - Sickness absence data alone will not indicate presentism, a significant burden for individuals and organisations. |

# SI 8: Ethical protocol

Prior to starting the survey, potential participants were informed about the purpose of the study, who was conducting it, that participation was voluntary, and they were free to withdraw from the survey at any time. Respondents were also informed about the role of the third-party platform that hosted the survey, the risks of participating, and how the data would be used. Respondents were provided information about the complaints procedure, including the contact details for the Ethical Review Board that approved the study (Medical Sciences Interdivisional Research Ethics Committee, University of Oxford Central University Research Ethics Committee, reference number: R62487/RE001). Before participants could proceed, documented, free, prior, and informed consent was sought. Individuals were asked to either disclose their age or indicate that they were over 18 – those that reported that they were under the age of 18 were excluded. On completing the survey, respondents were directed to a debriefing page, which included the contact details of the research team and Ethical Review Board and guidance on where to seek support if distressed by the survey.

# SI 9: More conservative definition of conservationists

We used a broad definition of conservationists, which may include those not currently formally employed in conservation or those who did not disclose their current employment status. A stricter definition of conservationists may include only those who currently work or conduct research within conservation. To explore the sensitivity of our primary analysis to how we define conservationists, we repeated the analysis with 2017 responses from those who said they worked or conducted research in conservation. The results of this analysis were consistent with the primary analysis (Figure S8).


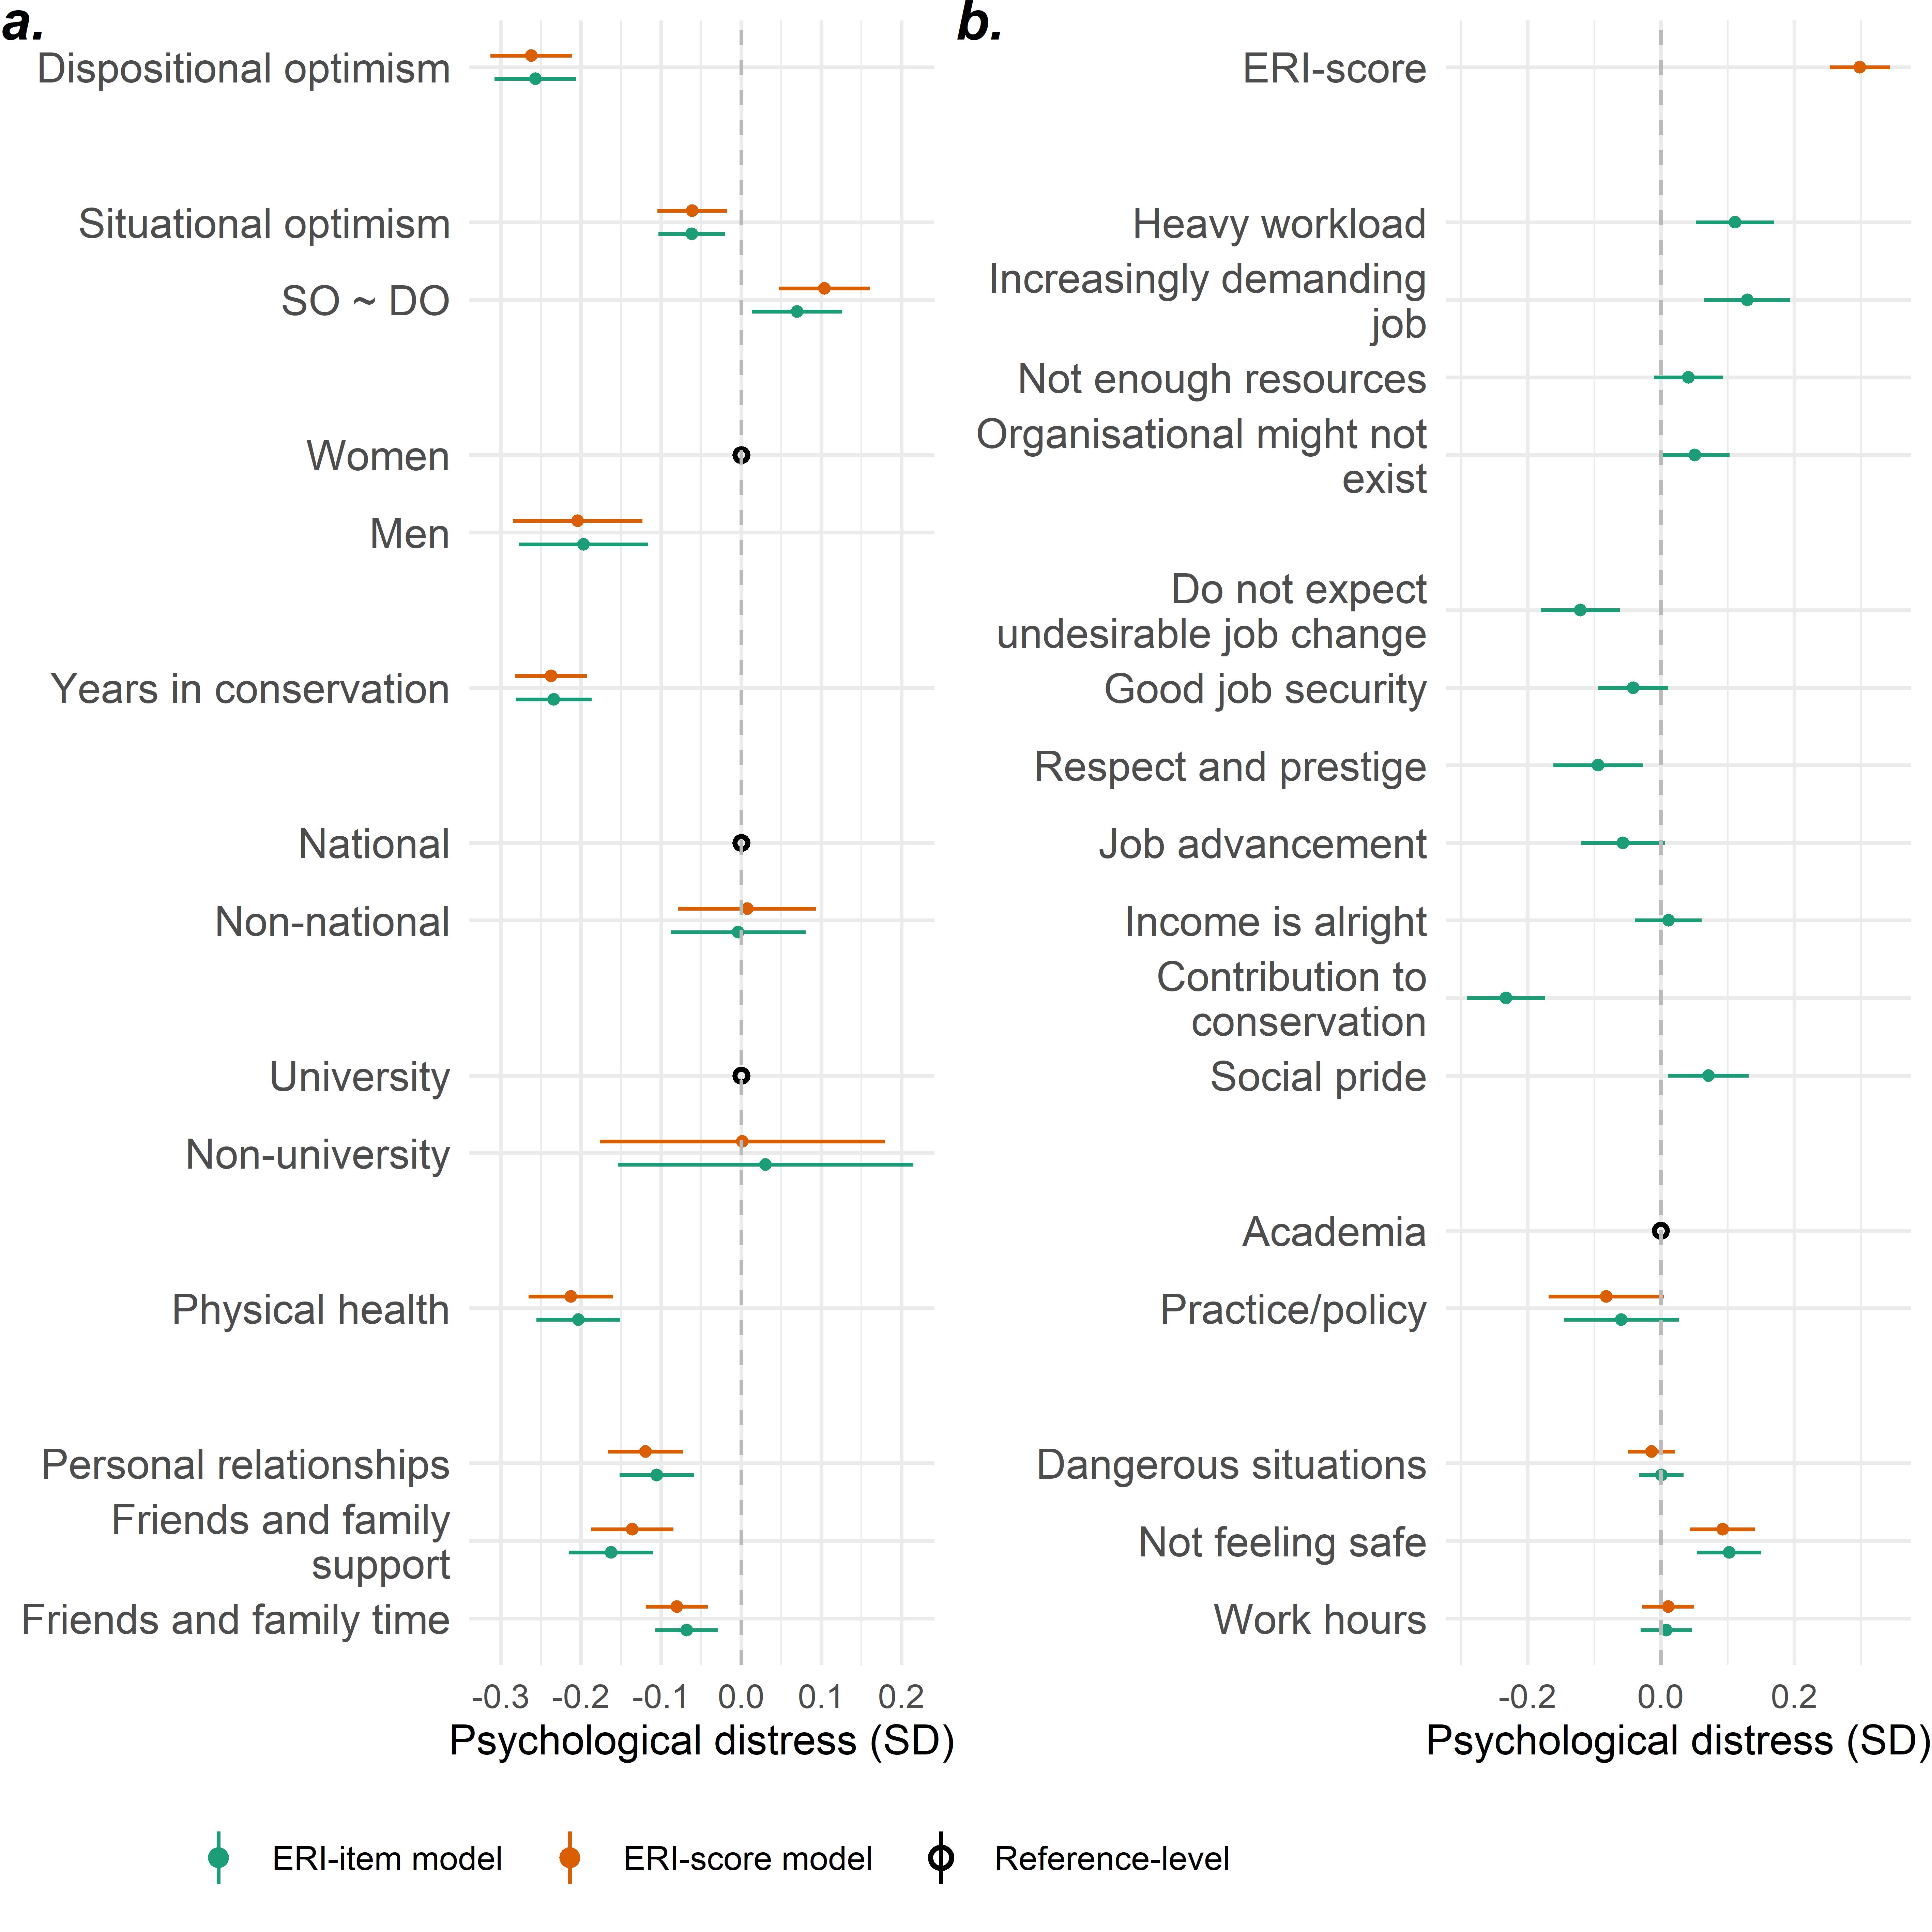


Figure S8. The estimated association in standard deviations (SD) between latent psychological distress and personal characteristics and occupational risk factors among 2017 respondents. This analysis was implemented with those who said they currently worked in conservation. ‘ERI-score model’ included the effort-reward imbalance score but excluded the individual instrument items, while the ‘ERI-item model’ included these items but excluded the score. Continuous variables were scaled and centred. ‘Unknown’ response levels are not shown.

# SI 10: Life Orientation Test - Revised

We estimated respondents latent dispositional optimism using data derived from the Life Orientation Test - Revised, which is a widely-used, standardised and validated tool35. In summary, the Life Orientation Test - Revised instrument includes three positively worded (scored 0 to 4) and three negatively worded (scored 4 to 0) items with five response levels ranging from ‘strongly disagree’ to ‘strongly agree’35. We did not include the four filler items found in the instrument. We used the factor structure described by Vecchione, et al. 36 and validated in a companion study2. This included estimating a factor representing the method effect associated with the positively worded items, which was assumed to be orthogonal to the dispositional optimism factor (so the covariance was set to 0).

# SI 11: Situational optimism instrument

To estimate situational optimism about conservation outcomes, we designed an instrument attended by six co-authors as discussed by Pienkowski, et al. 2. In summary, we considered the five strategic goals of the Aichi Biodiversity Targets to represent broadly held conservation aspirations and so developed pairs of statements based on them37. For each statement, respondents were asked about their expectations that each statement will be met over the next ten years. Response levels ranged from “definitely won't” (0) to “definitely will” (4).

We sought to develop an instrument that had good discriminatory power across a wide latent situational optimism range, so we included several very likely and unlikely outcomes. Correlated error terms were included to account for the dependencies between pairs of items when estimating the latent variable. The ten statements were:

1. … public support for conservation will grow over the next ten years
2. … government spending on conservation will grow over the next ten years
3. … the harmful impact of people on nature will be less in ten years than it is now
4. … human society will be more environmentally sustainable in ten years than it is now
5. … there will be more wildlife in ten years than there is today
6. … There will be more natural areas and habitats in ten years than there are today
7. … people will spend more recreational time in nature in ten years than they do now
8. … nature will be able to provide the same benefits to people in ten years as now
9. … there will be more local participation in conservation in ten years than now
10. … conservationists will have better tools and knowledge in ten years than now

# SI 12: Effort-reward imbalance model

Within social-exchange theory, there are established principles that influence peoples’ interactions. One of these is the ‘reciprocity rule’. This rule states that when one individual supplies a benefit, then the receiver should respond in-kind38. Breaking this rule – where effort is not compensated – is a stressor that can cause distress.

The effort-reward imbalance (ERI) model is informed by this rule39. It assumes that people work on the expectation that their efforts will be compensated through money, career opportunities, esteem and other occupational benefits. The experience of inadequate reward, in relation to effort, is a stressor39. Ongoing stress, as the result of an effort-reward imbalance, can harm both mental and physical health40. A number of studies explore associations between ERI and psychological distress in occupational environments. The ERI was positively associated with psychological distress in cross-sectional studies among 844 British academics, 78 Canadian police officers, 814 Canadian citizens, 1,803 Norwegians, 243 Japanese workers, and 2,596 US naval personnel 13-17. A large cross-sectional study of 10,308 civil servants in the UK found that ERI was correlated with psychological distress among men but not women18. These studies are observational and assume that ERI causes psychological distress. This assumption was tested in a multi-phase study of 211 Japanese workers that found a bi-directional relationship between ERI and psychological distress41. In other words, ERI appears to increase the risk of distress but suffering from distress simultaneously leads to greater ERI.

The ERI model has a standardised ten-item self-reporting instrument39. Three Likert-scaled items define effort. A set of six Likert-scaled items define reward. The instrument has four response levels ranging from (strongly disagree = 0) to strongly agree (4). Three items are reverse coded, after which the scores for each item are added together to give a total effort and a total reward score. A pre-defined equation (equation 1) is then used to calculate the effort-reward imbalance score42.

Equation 1:

Where *i* is the individual, *e* is the sum score of effort, *r* is the sum score of reward, and *c* is a correctional factor for the different number of items in the numerator and denominator (i.e. 3/6). A value of 1 indicates a balance between efforts and rewards, values approaching 0 indicate high reward vs low effort, and values above 1 indicate high effort vs low reward.

In addition to the ten statements within the original ERI model, we included five more that described unique challenges and rewards within the conservation sector (shown in bold below). Furthermore, to ease interpretability, we adjusted some of the phrases used in the instrument (underlined):

- [ERI1] I have constant time pressure due to a heavy work load
- [ERI2] I have many interruptions and disturbances while performing my job
- [ERI3] Over the past few years, my job has become more and more demanding
- **[ADD1] I do not have the resources I need to archive my work goals**
- **[ADD2] The organisation I work for does not have enough funding to achieve its main aims**
- **[ADD3] The organisation I work for may not exist in five years’ time**
- [ERI4] I receive the respect I deserve from my boss and work colleagues
- [ERI5] My job promotion or advancement prospects are poor (reverse coding)
- [ERI6] I have experienced or I expect to experience an undesirable change in my work situation (reverse coding)
- [ERI7] My job security is poor (reverse coding)
- [ERI8] Considering all my efforts and achievements, I receive the respect and prestige I deserve at work
- [ERI9] Considering all my efforts and achievements, my job promotion or advancement prospects are adequate (NA)
- [ERI10] Considering all my efforts and achievements, my salary or income is alright
- **[ADD4] I am satisfied with the contribution I make to conservation**
- **[ADD5] My friends and family are proud that I work in conservation**

# SI 13: Patterns of missing data

Around 1.3% of values in the survey data were missing (Figure S9 and S10).


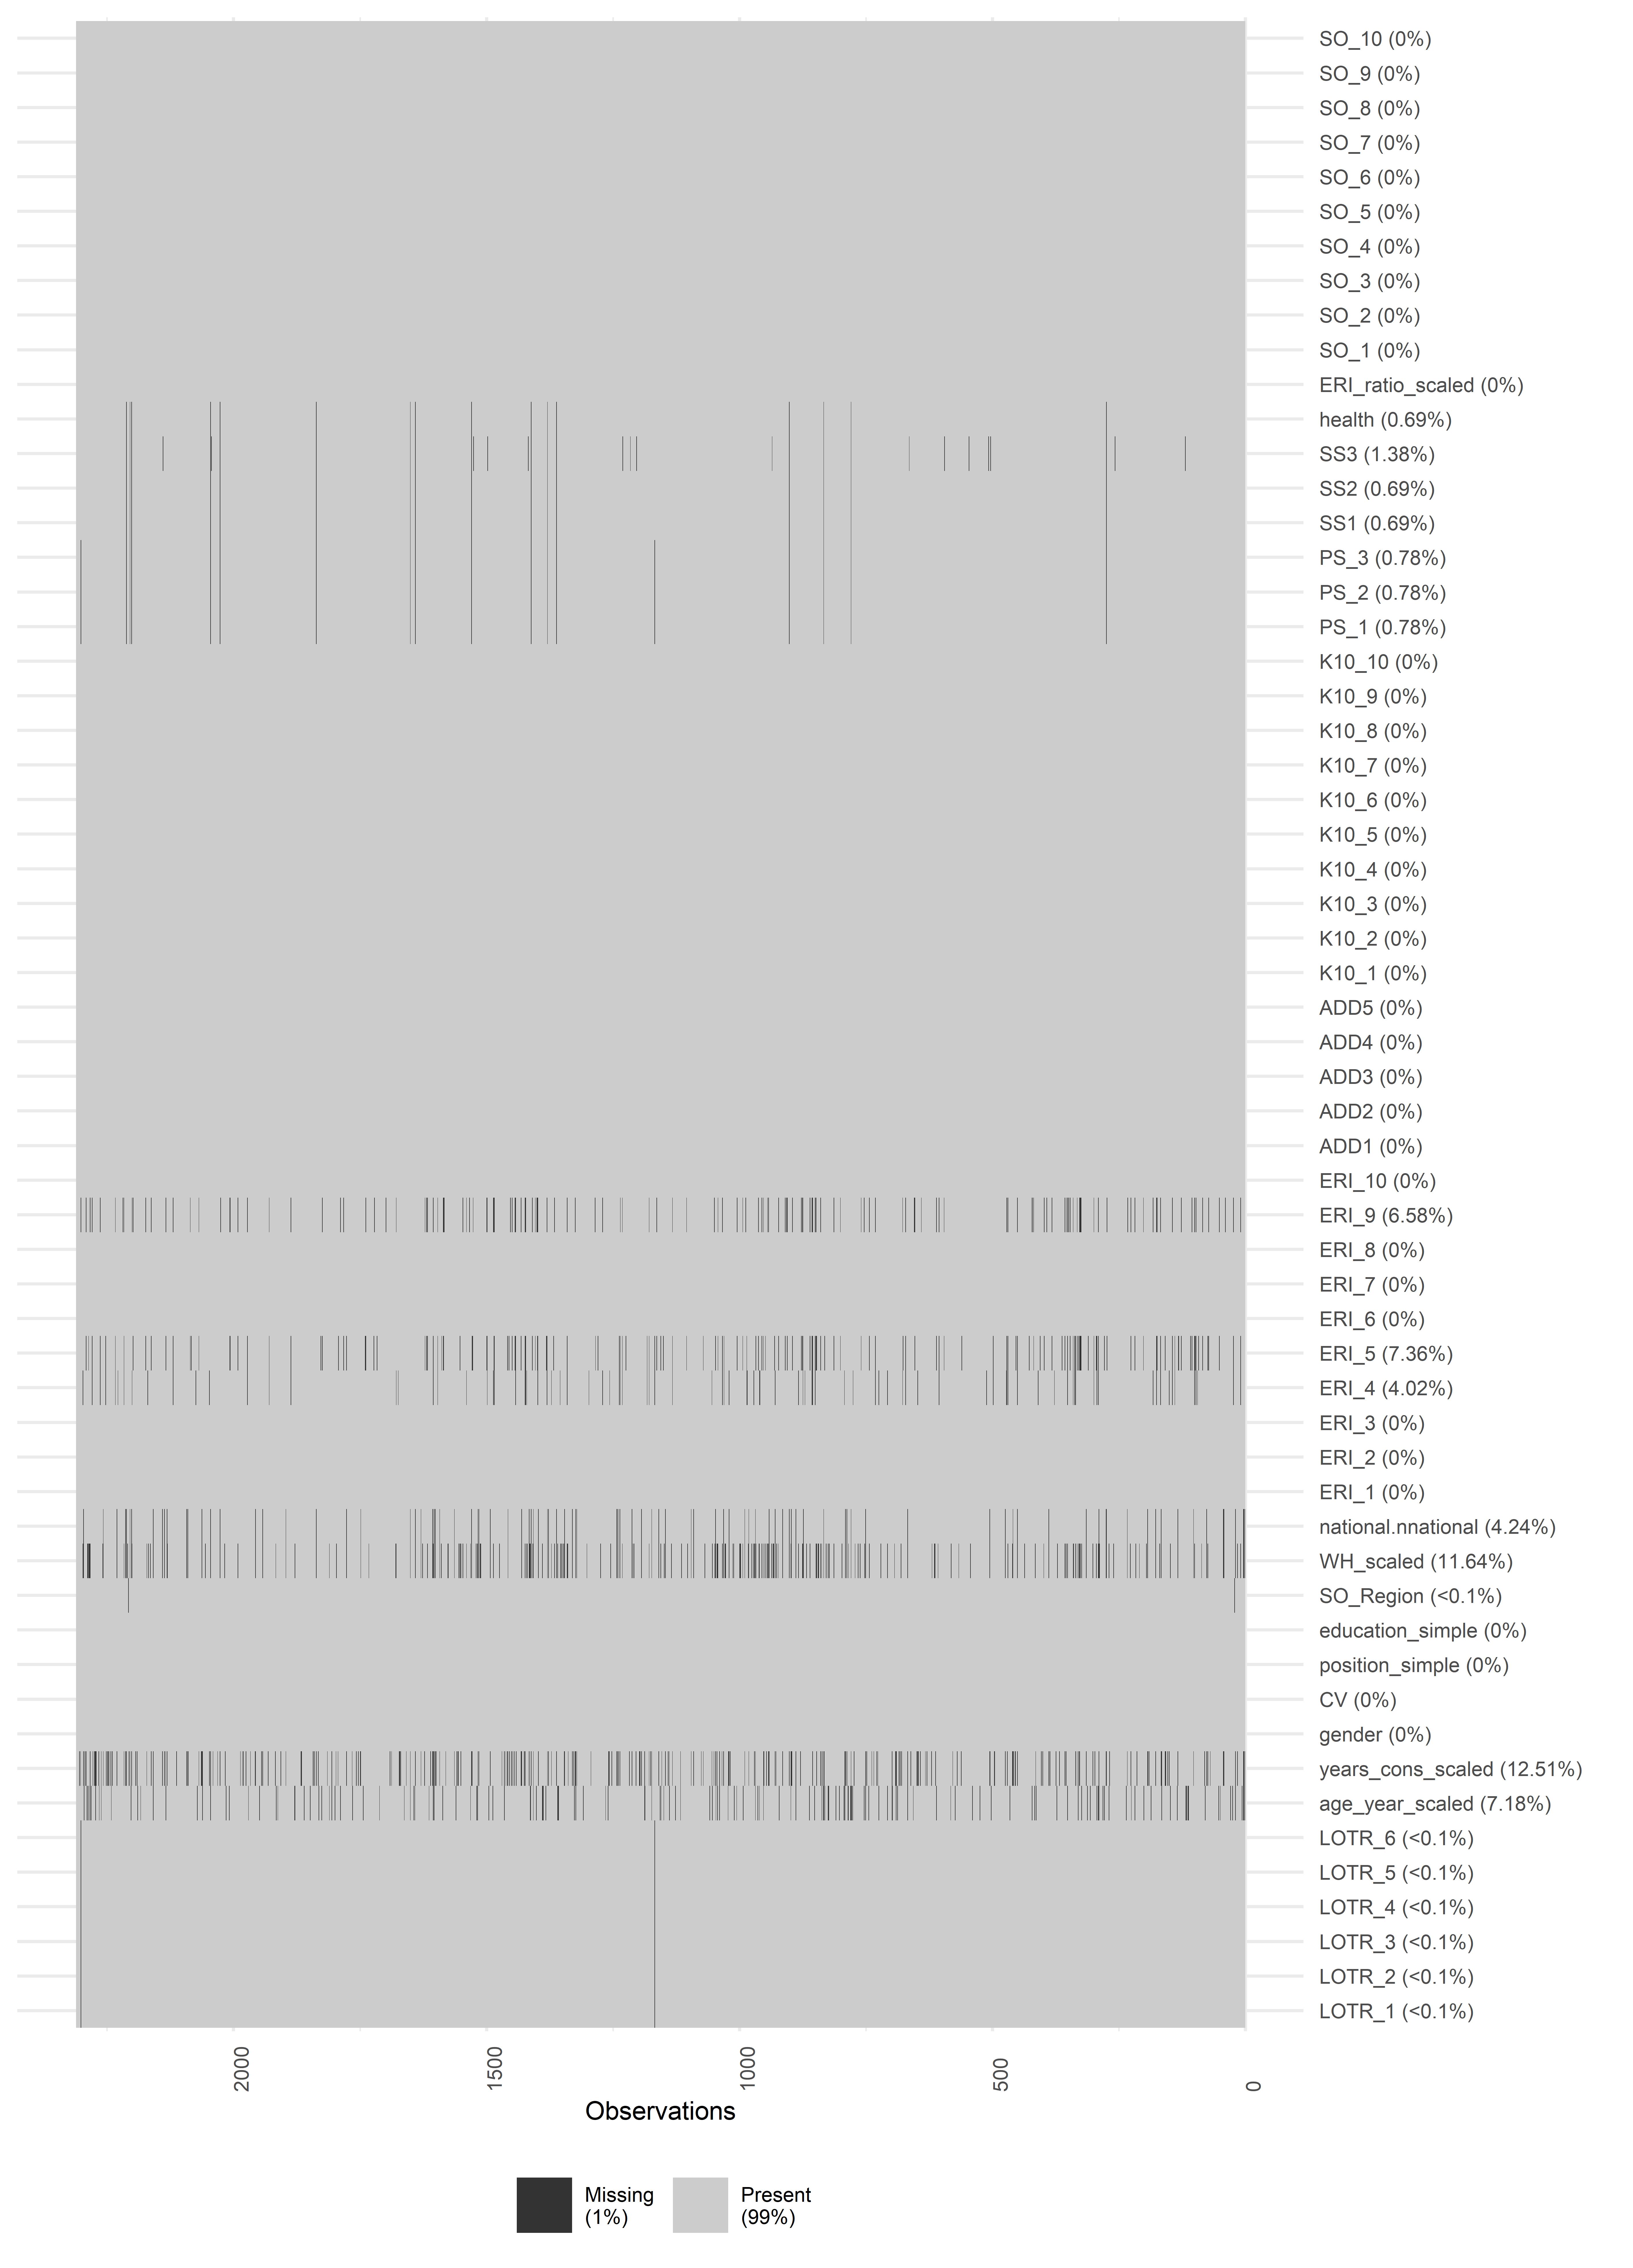


Figure S9. Illustrating which observations are missing.


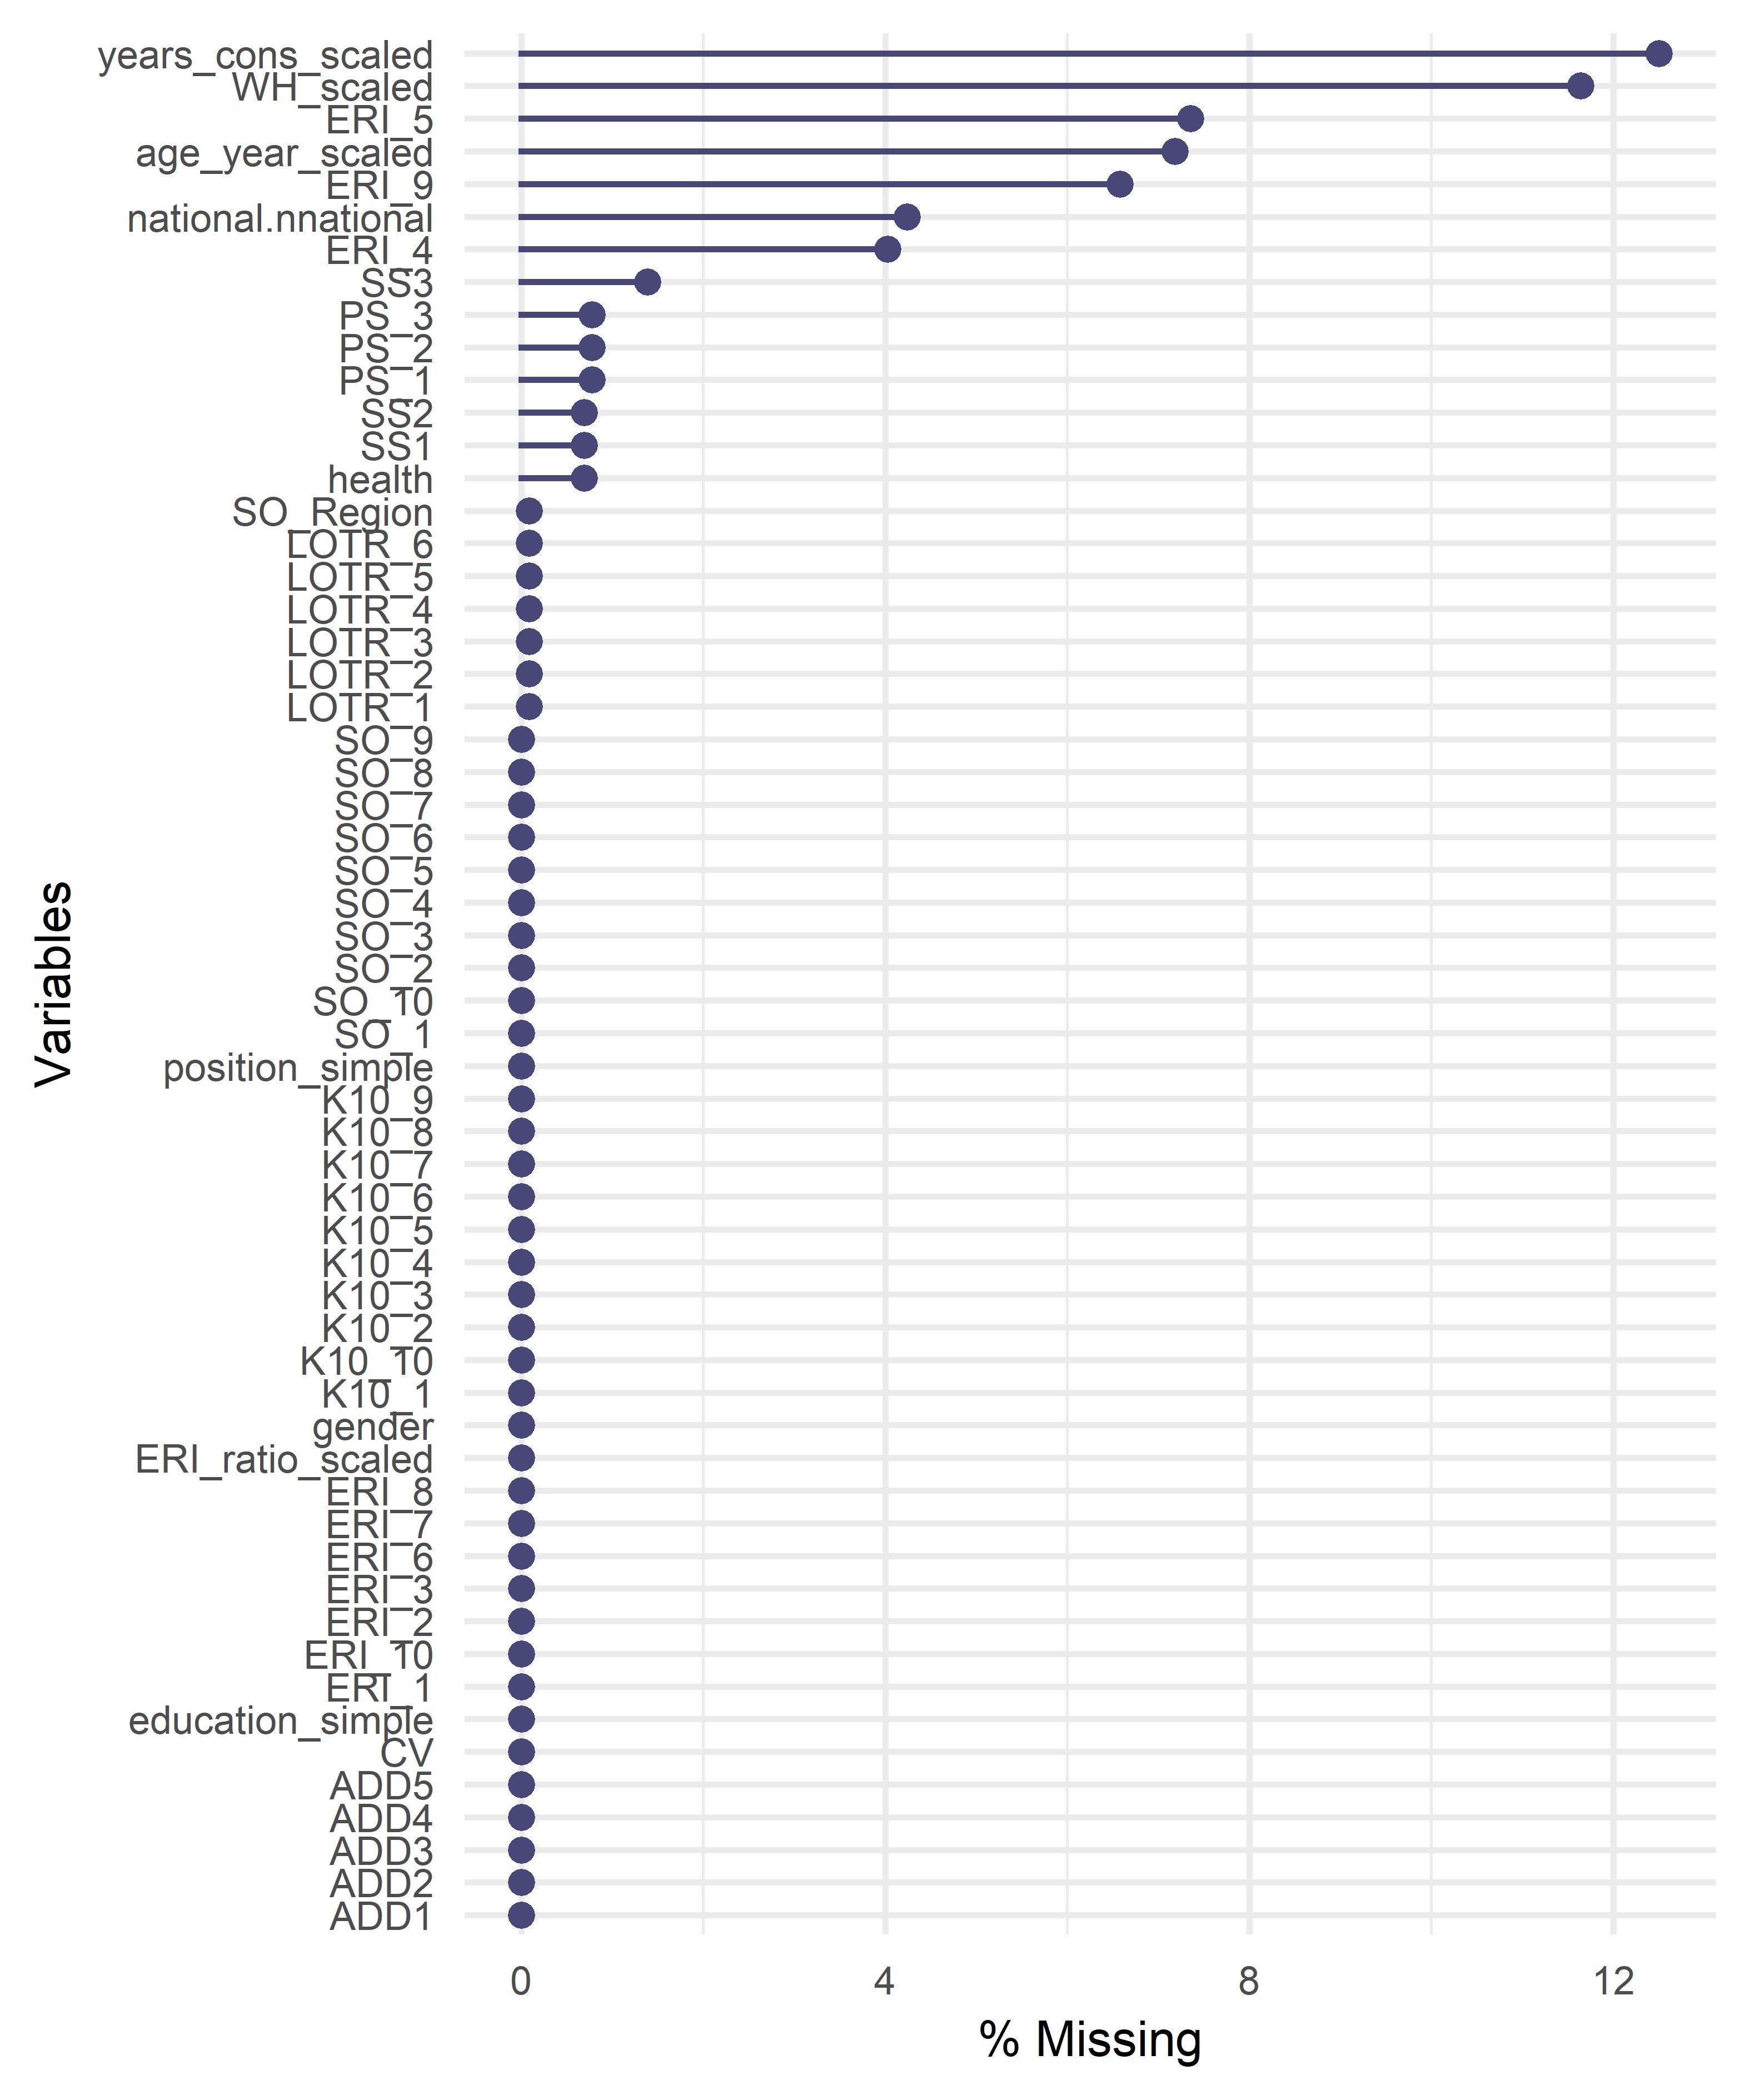


Figure S10. Illustrating the proportion of values missing for each variable.

# SI 14: Multivariate imputation through chained equations

Implementing an analysis with only complete cases can be an inefficient use of data that contains some missingness. For instance, if one value of a given variable is missing from an otherwise complete observation, that entire observation would still be excluded when only analysing complete cases. In these instances, it can be useful to substitute the missing value with plausible synthetic values. There are multiple methods for doing this. However, multivariate imputation by chained equations is a popular approach.

Multivariate imputation by chained equations creates synthetic values based on data within a specific observation (which is missing the value) and the associations between variables across observations43. As a hypothetical example, Respondent A did not disclose the number of years they worked in conservation, but they did report their age. Modelling across other respondents with complete cases found a 0.75 correlation between age and years in conservation. Based on this, the missing value for Respondent A can be estimated based on their reported age. However, that single estimate does not capture the uncertainty associated with the imputation. Therefore, multiple imputed datasets containing different plausible values (reflecting the underlying uncertainty with a given imputation) are typically used with secondary analysis.

A key assumption when using this approach is that data is Missing at Random. Missing at Random means that the probability that a value (like years of experience) is missing is not conditional on the outcome variable of interest (once accounting for the effect of all other observed variables)44. For example, the probability that values of years of experience are missing is the same for someone who is highly distressed as for someone with low levels of distress. We assumed that respondents did not want to disclose personal information for variables such as age because of concerns about anonymity. For other variables, including the missing ERI values, we assumed some did not respond because they felt the question did not apply to them. Based on this, we assumed that all missing values were Missing at Random.

Therefore, these missing data were substituted through multivariate imputation by chained equations creating ten datasets with imputed data, using the package ‘mice’45. Numeric variables with predictive mean matching, ordinal variables were imputed using proportional odds models, and unordered categorical variables with polytomous logistic regression. The pre- and post-imputation distributions of variables were inspections and were consistent.

# References

1 Conversano, C. *et al.* Optimism and its impact on mental and physical well-being. *Clinical Practice & Epidemiology in Mental Health* **6**, 25-29, doi:10.2174/1745017901006010025 (2010).

2 Pienkowski, T. *et al.* Personal traits predict conservationists’ optimism about outcomes for nature *Conservation Letters* (in review).

3 Jones, M. S. & Solomon, J. Challenges and supports for women conservation leaders. *Conservation Science and Practice* **1**, 1-11, doi:10.1111/csp2.36 (2019).

4 Drapeau, A., Marchand, A. & Forest, C. Gender differences in the age-cohort distribution of psychological distress in Canadian adults: Findings from a national longitudinal survey. *BMC Psychology* **2**, 25, doi:10.1186/s40359-014-0025-4 (2014).

5 Drapeau, A., Marchand, A. & Beaulieu-Prévost, D. in *Mental illnesses: Understanding, prediction and control* (ed Luciano L'Abate) Ch. 5, 105-134 (INTECH, 2012).

6 Pienkowski, T. *et al.* Balancing making a difference with making a living in the conservation sector. *Conservation Biology*, doi:<https://doi.org/10.1111/cobi.13846> (2021).

7 Ager, A. *et al.* Stress, mental health, and burnout in national humanitarian aid workers in Gulu, northern Uganda. *Journal of Traumatic Stress* **25**, 713-720, doi:10.1002/jts.21764 (2012).

8 Eriksson, C. B. *et al.* Social support, organisational support, and religious support in relation to burnout in expatriate humanitarian aid workers. *Mental Health, Religion & Culture* **12**, 671-686, doi:10.1080/13674670903029146 (2009).

9 Wang, J. L., Schmitz, N. & Dewa, C. S. Socioeconomic status and the risk of major depression: The Canadian national population health survey. *Journal of Epidemiology and Community Health* **64**, 447-452, doi:10.1136/jech.2009.090910 (2010).

10 Freeman, A. *et al.* The role of socio-economic status in depression: Results from the COURAGE (aging survey in Europe). *BMC Public Health* **16**, 1-8, doi:10.1186/s12889-016-3638-0 (2016).

11 Ohrnberger, J., Fichera, E. & Sutton, M. The relationship between physical and mental health: A mediation analysis. *Social Science and Medicine* **195**, 42-49, doi:10.1016/j.socscimed.2017.11.008 (2017).

12 Uchino, B. N. Social support and health: A review of physiological processes potentially underlying links to disease outcomes. *Journal of Behavioral Medicine* **29**, 377-387, doi:10.1007/s10865-006-9056-5 (2006).

13 Janzen, B. L., Muhajarine, N., Zhu, T. & Kelly, I. W. Effort-reward imbalance, overcommitment, and psychological distress in Canadian police officers. *Psychological Reports* **100**, 525-530, doi:10.2466/pr0.100.2.525-530 (2007).

14 Kinman, G. & Jones, F. Effort-reward imbalance and overcommitment: Predicting strain in academic employees in the United Kingdom. *International Journal of Stress Management* **15**, 381-395, doi:10.1037/a0013213 (2008).

15 Lau, B. Effort-reward imbalance and overcommitment in employees in a Norwegian municipality: A cross sectional study. *Journal of Occupational Medicine and Toxicology* **3**, 1-11, doi:10.1186/1745-6673-3-9 (2008).

16 Bridger, R. S., Dew, A., Brasher, K., Munnoch, K. & Kilminster, S. Chronic and acute psychological strain in naval personnel. *Occupational Medicine* **59**, 454-458, doi:10.1093/occmed/kqp104 (2009).

17 Aboa, B. Effort-reward imbalance at work and psychological distress: A validation study of post-myocardial infarction patients. *Psychosomatic Medicine* **73**, 448-455, doi:10.1097/PSY.0b013e31829d1e0a (2011).

18 Stansfeld, S. A., Fuhrer, R., Shipley, M. & Marmot, M. Work characteristics predict psychiatric disorder: Prospective results from the Whitehall II study. *Occupational and Environmental Medicine* **56**, 302-307, doi:10.1136/oem.56.5.302 (1999).

19 Davey, J. D., Obst, P. L. & Sheehan, M. C. Demographic and workplace characteristics which add to the prediction of stress and job satisfaction within the police workplace. *Journal of Police and Criminal Psychology* **16**, 29-39, doi:10.1007/BF02802731 (2001).

20 Keinan, G. & Malach-Pines, A. Stress and burnout among prison personnel: Sources, outcomes, and intervention strategies. *Criminal Justice and Behavior* **34**, 380-398, doi:10.1177/0093854806290007 (2007).

21 Harvey, S. B. *et al.* Can work make you mentally ill? A systematic meta-review of work-related risk factors for common mental health problems. *Occupational and Environmental Medicine* **74**, 301-310, doi:10.1136/oemed-2016-104015 (2017).

22 Deci, E. L. & Ryan, R. M. The "what" and "why" of goal pursuits: Human needs and the self-determination of behavior. *Psychological Inquiry* **11**, 227-268, doi:10.1207/S15327965PLI1104_01 (2000).

23 Ryan, R. M. & Deci, E. L. On happiness and human potentials: A review of research on hedonic and eudaimonic well-being. *Annual Review of Psychology* **52**, 141-166, doi:10.1146/annurev.psych.52.1.141 (2001).

24 Strauman, T. J. Self-regulation and depression. *Self and Identity* **1**, 151-157, doi:10.1080/152988602317319339 (2002).

25 Wrosch, C., Scheier, M. F. & Miller, G. E. Goal adjustment capacities, subjective well-being, and physical health. *Social and Personality Psychology Compass* **7**, 847-860, doi:10.1111/spc3.12074 (2013).

26 Klug, H. J. P. & Maier, G. W. Linking goal progress and subjective well-being: A meta-analysis. *Journal of Happiness Studies* **16**, 37-65, doi:10.1007/s10902-013-9493-0 (2014).

27 de Groot, J. I. & Steg, L. Value orientations to explain environmental attitudes and beliefs: How to measure egoistic, altruistic and biospheric value orientations. *Environment and Behavior* **40**, 330-354, doi:10.1177/0013916506297831 (2007).

28 Papworth, S., Thomas, R. L. & Turvey, S. T. Increased dispositional optimism in conservation professionals. *Biodiversity and Conservation* **28**, 401-414, doi:10.1007/s10531-018-1665-0 (2019).

29 Stevenson, D. & Farmer, P. Thriving at work: The Stevenson / Farmer review of mental health and employers. 1-84 (Department for Work and Pensions and Department of Health, London, United Kingdom, 2017).

30 Universal Ranger Support Alliance (URSA). Action plan for supporting implementation of the International Ranger Federation's Chitwan Declaration and furthering the professionalisation of rangers (2021 - 2025). 1-38 (Universal Ranger Support Alliance, 2021).

31 Barton, J. & Pretty, J. What is the best dose of nature and green exercise for improving mental health? A multi-study analysis. *Environmental Science & Technology* **44**, 3947-3955, doi:10.1021/es903183r (2010).

32 Catalano, A. S., Redford, K., Margoluis, R. & Knight, A. T. Black swans, cognition, and the power of learning from failure. *Conservation Biology* **32**, 584-596, doi:<https://doi.org/10.1111/cobi.13045> (2018).

33 Duchaine, C. S. *et al.* Psychosocial stressors at work and the risk of sickness absence due to a diagnosed mental disorder: A systematic review and meta-analysis. *JAMA Psychiatry* **77**, 842-851, doi:10.1001/jamapsychiatry.2020.0322 (2020).

34 van der Molen, H. F., Nieuwenhuijsen, K., Frings-Dresen, M. H. W. & de Groene, G. Work-related psychosocial risk factors for stress-related mental disorders: An updated systematic review and meta-analysis. *BMJ Open* **10**, e034849, doi:10.1136/bmjopen-2019-034849 (2020).

35 Scheier, M. F., Carver, C. S. & Bridges, M. W. Distinguishing optimism from neuroticism (and trait anxiety, self-mastery, and self-esteem): A re-evaluation of the Life Orientation Test. *Journal of Personality and Social Psychology* **67**, 1063-1078, doi:10.1037//0022-3514.67.6.1063 (1994).

36 Vecchione, M., Alessandri, G., Caprara, G. V. & Tisak, J. Are method effects permanent or ephemeral in nature? The case of the Revised Life Orientation Test. *Structural Equation Modeling: A Multidisciplinary Journal* **21**, 117-130, doi:10.1080/10705511.2014.859511 (2014).

37 Convention on Biological Diversity (CBD) Secretariat. The Strategic Plan for Biodiversity 2011-2020 and the Aichi Biodiversity Targets COP 10 Decision X/2. 1-13 (Nagoya, Japan, 2010).

38 Cropanzano, R. & Mitchell, M. S. Social exchange theory: An Interdisciplinary review. *Journal of Management* **31**, 874-900, doi:10.1177/0149206305279602 (2005).

39 Siegrist, J. Adverse health effects of high-effort low-reward conditions. *Journal of Occupational Health Psychology* **1**, 27-41, doi:10.1037/1076-8998.1.1.27 (1996).

40 van Vegchela, N., de Jongea, J., Bosmab, H. & Schaufelia, W. Reviewing the effort-reward imbalance model: Drawing up the balance of 45 empirical studies. *Social Science and Medicine* **60**, 1117-1131, doi:10.1016/j.socscimed.2004.06.043 (2005).

41 Shimazu, A. & de Jonge, J. Reciprocal relations between effort-reward imbalance at work and adverse health: A three-wave panel survey. *Social Science and Medicine* **68**, 60-68, doi:10.1016/j.socscimed.2008.09.055 (2009).

42 Siegrist, J. *et al.* The measurement of effort-reward imbalance at work: European comparisons. *Social Science and Medicine* **58**, 1483-1499, doi:10.1016/S0277-9536(03)00351-4 (2004).

43 Schafer, J. L. & Graham, J. W. Missing data: Our view of the state of the art. *Psychological Methods* **7**, 147-177, doi:10.1037//1082-989X.7.2.147 (2002).

44 Azur, M. J., Stuart, E. A., Frangakis, C. & Leaf, P. J. Multiple imputation by chained equations: What is it and how does it work? *International Journal of Methods in Psychiatric Research* **20**, 40-49, doi:10.1002/mpr.329 (2011).

45 van Buuren S & K, G.-O. mice: multivariate imputation by chained equations in R. *Journal of Statistical Software* **45**, 1-67, doi:10.18637/jss.v045.i03 (2011).
